# Supplementary material for: Heavy atom oriented orbital angular momentum manipulation in metal-free organic phosphors
Source: Royal Society of Chemistry journal article supplement (doi:10.1039/d1sc05689a), 2021-12-24
Supplement: d1sc05689a1.pdf [file d1sc05689a1.pdf]

# Heavy Atom Oriented Orbital Angular Momentum Manipulation in Metal-Free Organic Phosphors

Wenhao Shao<sup>†</sup>, Hanjie Jiang<sup>†</sup>, Ramin Ansari<sup>‡</sup>, Paul M. Zimmerman<sup>\*,†</sup>, Jinsang Kim<sup>\*,†,‡,§,°</sup>

*<sup>†</sup>Department of Chemistry, <sup>‡</sup>Department of Chemical Engineering, <sup>§</sup>Department of Materials Science and Engineering, and <sup>°</sup>Macromolecular Science and Engineering, University of Michigan, Ann Arbor, Michigan, 48109, United States. \*paulzim@umich.edu (P.M.Z.)  
\*jinsang@umich.edu (J.K.)*

## Contents

|      |                                                  |    |
|------|--------------------------------------------------|----|
| I.   | Additional experimental details .....            | 2  |
| II.  | Computational details .....                      | 8  |
| III. | Reduced SOCME in the selected orientations ..... | 9  |
| IV.  | Emission/excitation spectra .....                | 11 |
| V.   | Additional lifetime information .....            | 19 |
| VI.  | NMR spectra .....                                | 25 |
| VII. | References .....                                 | 48 |

## I. Additional experimental details

### General

All chemicals used were purchased from Millipore Sigma or Fisher Scientific unless specified and used without further purification. (2-Bromophenyl)hydrazine was purchased from Oakwood Products, Inc.. Deuterated solvents for NMR spectroscopy (nuclear magnetic resonance) were purchased from Cambridge Isotope Laboratories. Phenoxathiine (S-O, 98.0+%) and 9H-thioxanthen-9-one (S-CO, 98.0+%) were purchased from TCI America and used without further purification. 9H-selenoxanthen-9-one (Se-CO) was purchased from Millipore Sigma and used without purification.

### Physical measurements

Nuclear Magnetic Resonance (NMR) spectra were collected on Varian MR400 (400 MHz), Varian Vnmrs 500 (500 MHz), or Varian Vnmrs 700 (700 MHz) spectrometer as indicated. Photoluminescence spectra were collected on a Photon Technologies International (PTI) QuantaMaster spectrofluorometer (QM-400) equipped with an integrating sphere (K-Sphere) and a cryostat. The emitters were doped in atactic PMMA matrix for solid-state measurements: quartz substrates (1.5\*2.5 cm) were prepared and cleaned by sonication consecutively in soap, deionized water, acetone, isopropyl alcohol, and then proceeded to UV-ozone treatment for 30 min. Chloroform solution containing 0.025 wt% emitter and 2.5 wt% PMMA was prepared and spin-coated on the cleaned quartz substrates (500 rpm for 5 min). Last, the films were transferred into a glovebox filled with N<sub>2</sub> and baked at 120 °C for 30 min.

### Synthesis of prototype molecules

We've designed a series of molecules in this report to provide systematic experimental support for the HAAM concept, as well as to demonstrate the capability of the HAAM concept in creating highly efficient POPs. The synthetic scheme of 10-methyl-10H-phenothiazine (S-N) and 10-methyl-10H-phenoselenazine (Se-N) were adopted and modified from ref 1. The scheme of 10-mesityl-10H-dibenzo[*b,e*][1,4]thiaborinine (S-B) and 10-mesityl-10H-dibenzo[*b,e*][1,4]selenaborinine (Se-B) were adopted and modified from ref 2. The scheme of phenoxaselenine (Se-O) was adopted from ref 3. Phenoxathiine (S-O, 98.0+%) and 9H-thioxanthen-9-one (S-CO, 98.0+%) were purchased from TCI America and used without further purification. 9H-selenoxanthen-9-one (Se-CO) was purchased from Millipore Sigma and used without purification.

#### ▪ (Se-N, 1) 10-methyl-10H-phenoselenazine

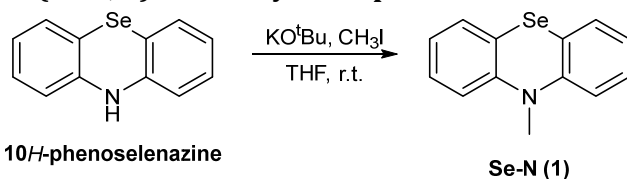

The synthetic procedure for 10H-phenoselenazine was described in ref 4.

10H-phenoselenazine (98 mg, 0.4 mmol, 1 eq.) and potassium tert-butoxide (67 mg, 0.6 mmol, 1.5 eq.) were dissolved in anhydrous THF (3 mL) at 0 °C. After stirring for 20 min, methyl iodide (142 mg, 1 mmol, 2.5 eq.) was added to the solution. The mixture was stirred at room temperature overnight. Then, the reaction was quenched with water and the resulting mixture was extracted with CH<sub>2</sub>Cl<sub>2</sub>. The combined organic layers were washed with brine,

dried over Na<sub>2</sub>SO<sub>4</sub>, filtered and evaporated to dryness under vacuum. The crude product was further purified with flash column chromatography (Hexane/CH<sub>2</sub>Cl<sub>2</sub>) to afford 10-methyl-10H-phenoselenazine (Se-N, **1**) as a white solid (17.0 mg, 16.4% yield).

- <sup>1</sup>H NMR (500 MHz, Chloroform-d) δ 7.32 (dd, J = 7.5, 1.4 Hz, 2H), 7.22 (td, J = 8.2, 1.4 Hz, 2H), 6.97 – 6.90 (m, 4H), 3.44 (s, 3H).
- <sup>1</sup>H NMR (500 MHz, DMSO-d<sub>6</sub>) δ 7.34 (dd, J = 7.5, 1.3 Hz, 2H), 7.29 – 7.23 (m, 2H), 7.03 (d, J = 8.1 Hz, 2H), 7.00 – 6.94 (m, 2H), 3.36 (s, 3H).
- <sup>13</sup>C NMR (126 MHz, DMSO-d<sub>6</sub>) δ 145.86, 129.89, 128.37, 123.40, 119.30, 116.20, 37.12.
- <sup>77</sup>Se NMR (134 MHz, DMSO-d<sub>6</sub>) δ 278.89.

▪ **(S-N, 2) 10-methyl-10H-phenothiazine**

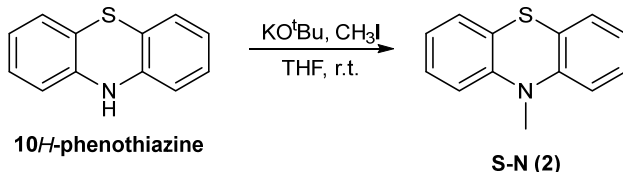

10H-phenothiazine (1 g, 5 mmol, 1 eq.) and potassium tert-butoxide (0.845 g, 7.5 mmol, 1.5 eq.) were dissolved in anhydrous THF (10 mL) at 0 °C. After stirring for 20 min, methyl iodide (0.623 mL or 1.42 g, 10 mmol, 2 eq.) was added to the solution. The mixture was stirred at room temperature overnight. Then, the reaction was quenched with water, and the resulting mixture was extracted with CH<sub>2</sub>Cl<sub>2</sub>. The combined organic layers were washed with brine, dried over Na<sub>2</sub>SO<sub>4</sub>, filtered and evaporated to dryness under vacuum. The crude product was further purified with flash column chromatography (Hexane/CH<sub>2</sub>Cl<sub>2</sub>) to afford the pure 10-methyl-10H-phenothiazine (S-N, **2**) as a white solid (992.2 mg, 92.69% yield).

- <sup>1</sup>H NMR (401 MHz, Chloroform-d) δ 7.21 – 7.10 (m, 4H), 6.98 – 6.88 (m, 2H), 6.82 (d, J = 8.1 Hz, 2H), 3.38 (s, 3H).
- <sup>1</sup>H NMR (500 MHz, DMSO-d<sub>6</sub>) δ 7.24 – 7.19 (m, 2H), 7.15 (dd, J = 7.8, 1.0 Hz, 2H), 6.96 (t, J = 7.3 Hz, 4H), 3.30 (s, 3H).
- <sup>13</sup>C NMR (126 MHz, DMSO-d<sub>6</sub>) δ 145.78, 128.21, 127.22, 122.92, 122.53, 115.05, 35.56.

▪ **Dimethyl mesitylboronate, or MesB(OMe)<sub>2</sub>**

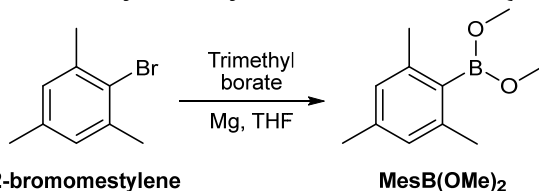

(adopted and modified from ref 5,6.)

Mesityl magnesium bromide was prepared from 2-bromomesitylene (10.0 g, 50.23 mmol), magnesium turnings (1.343 g, 55.25 mmol, 1.1 eq.), and a small iodine crystal (127 mg, 0.5023 mmol, 0.01 eq.) in anhydrous THF (100 mL). After cloudiness appeared from the original clear solution, the mixture was refluxed for 2 hours at 80 °C or until all the magnesium disappeared, air-cooled to room temperature, and then slowly cooled to -78 °C using a liquid nitrogen/ethyl acetate bath. Trimethyl borate (6.440 mL, 57.76 mmol, 1.15 eq.) was added quickly and the solution was slowly warmed to room temperature overnight.

Afterwards, solvent was removed in vacuo and the residue was extracted with Ar-degassed hexanes. Solvent was completely removed from the crude mixture under reduced pressure to get an opaque oil which was distilled in vacuo ( $10^{-3}$  mbar, 130-200 °C) to obtain MesB(OMe)<sub>2</sub> as a colorless, transparent oil (4.069 g, 42.2% yield), which was stored in a desiccator in vacuum.

- <sup>1</sup>H NMR (400 MHz, Chloroform-d) δ 6.81 (s, 2H), 3.56 (s, 5H), 2.32 – 2.20 (m, 9H).
- <sup>11</sup>B NMR (128 MHz, Chloroform-d) δ 31.30.

#### ▪ Bis(2-bromophenyl)selane

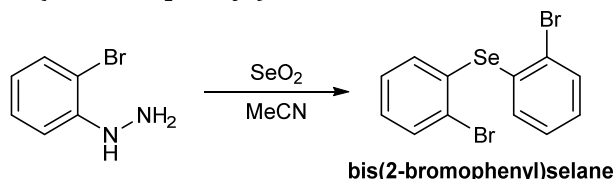

(2-bromophenyl)hydrazine

bis(2-bromophenyl)selane

(adopted and modified from ref 7.)

2-bromophenylhydrazine (2 g, 10.69 mmol, 1 eq.) was dissolved in acetonitrile (25 mL) and added to a stirred suspension of selenium dioxide (1.78 g, 16.04 mmol, 1.5 eq.) in acetonitrile (25 mL). The suspension turned orange and then orange-red after bubble formation, and was then stirred at 60 °C for 1 h. Desired product was observed on TLC after 1 h and the resulting mixture was extracted with hexane to afford a red solution. After concentration under reduced pressure, the crude product was further purified with flash column chromatography (hexane) to afford bis(2-bromophenyl)selane as a yellow-orange solid (344.2 mg, 16.5% yield).

- <sup>1</sup>H NMR (500 MHz, Chloroform-d) δ 7.63 (dd, J = 7.6, 1.6 Hz, 2H), 7.25 (dd, J = 7.6, 1.9 Hz, 2H), 7.23 – 7.13 (m, 4H).
- <sup>13</sup>C NMR (126 MHz, DMSO-d<sub>6</sub>) δ 134.44, 133.78, 132.71, 130.45, 129.44, 126.61.
- <sup>77</sup>Se NMR (95 MHz, Chloroform-d) δ 462.71.

#### ▪ (Se-B, 5) 10-mesityl-10H-dibenzo[*b,e*][1,4]selenaborinine

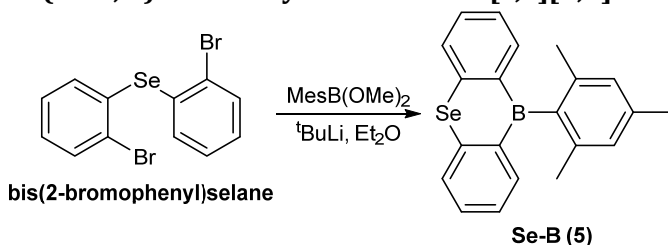

bis(2-bromophenyl)selane

Se-B (5)

<sup>t</sup>BuLi (1.9M pentane solution, 0.303 mL, 0.5766 mmol, 4.42 eq.) was added to a solution of bis(2-bromophenyl)selane (51 mg, 0.1304 mmol, 1 eq.) in diethyl ether (3 mL) at -78 °C. After stirring for 30 min at -78 °C, MesB(OMe)<sub>2</sub> (37.58 mg, 0.1957 μmol, 1.40 eq.) in diethyl ether (1.5 mL) was added to the reaction mixture. The mixture was warmed up to room temperature and stirred overnight before quenched with water. The organic layer was extracted with CHCl<sub>3</sub> and dried over anhydrous Na<sub>2</sub>SO<sub>4</sub>. After removal of the solvent under reduced pressure, the residue was purified with flash column chromatography (hexane) to afford 10-mesityl-10H-dibenzo[*b,e*][1,4]selenaborinine (Se-B, 5) as a yellow solid (19.85 mg, 42.1% yield).

- $^1\text{H}$  NMR (500 MHz, Chloroform- $d$ )  $\delta$  7.92 – 7.87 (m, 1H), 7.84 (d,  $J$  = 7.9 Hz, 1H), 7.57 – 7.51 (m, 1H), 7.29 (t,  $J$  = 7.4 Hz, 1H), 6.94 (s, 1H), 2.41 (s, 2H), 1.93 (s, 3H).
- $^1\text{H}$  NMR (401 MHz, DMSO- $d_6$ )  $\delta$  8.01 (d,  $J$  = 7.6 Hz, 1H), 7.72 (dd,  $J$  = 7.7, 1.3 Hz, 1H), 7.69 – 7.61 (m, 1H), 7.41 – 7.34 (m, 1H), 6.92 (s, 1H), 2.33 (s, 2H), 1.83 (s, 3H).
- $^{13}\text{C}$  NMR (126 MHz, DMSO- $d_6$ )  $\delta$  143.74, 140.39, 137.46, 136.11, 134.96, 132.75, 127.86, 127.07, 125.71, 118.06, 22.50, 20.85.
- $^{11}\text{B}$  NMR (128 MHz, Chloroform- $d$ )  $\delta$  61.79.
- $^{77}\text{Se}$  NMR (95 MHz, Chloroform- $d$ )  $\delta$  409.75.

#### ▪ Bis(2-bromophenyl)sulfane

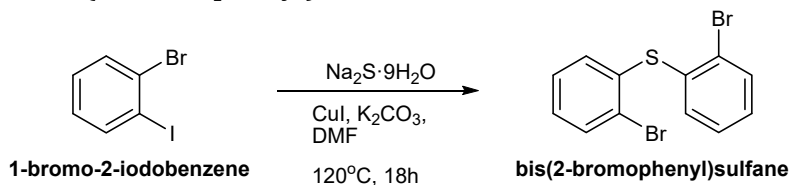

(adopted and modified from ref 8.)

CuI (38.5 mg, 0.202 mmol, 0.2 eq.),  $\text{K}_2\text{CO}_3$  (279 mg, 2.02 mmol, 2 eq.),  $\text{Na}_2\text{S}$  (291 mg, 1.21 mmol, 1.2 eq.) and 1-bromo-2-iodobenzene (572 mg, 2.02 mmol, 2 eq.) were mixed in DMF (4 mL). The mixture was heated at 120°C overnight and allowed to cool to room temperature. The resulting mixture was extracted with ethyl acetate. The combined organic layers were dried over  $\text{Na}_2\text{SO}_4$  and then concentrated under reduced pressure. The crude product was purified with flash column chromatography (hexane) to afford bis(2-bromophenyl)sulfane as white powder (126.4 mg, 36.3% yield).

- $^1\text{H}$  NMR (401 MHz, Chloroform- $d$ )  $\delta$  7.65 (dd,  $J$  = 7.8, 1.2 Hz, 2H), 7.24 (dd,  $J$  = 7.6, 1.4 Hz, 2H), 7.18 – 7.11 (m, 4H).
- $^1\text{H}$  NMR (500 MHz, DMSO- $d_6$ )  $\delta$  7.79 – 7.75 (m, 2H), 7.42 – 7.38 (m, 2H), 7.30 (td,  $J$  = 7.6, 1.3 Hz, 2H), 7.13 (dd,  $J$  = 7.8, 1.4 Hz, 2H).
- $^{13}\text{C}$  NMR (126 MHz, DMSO- $d_6$ )  $\delta$  134.81, 134.02, 132.68, 130.13, 129.43, 125.35.

#### ▪ (S-B, 6) 10-mesityl-10H-dibenzo[*b,e*][1,4]thiaborinine

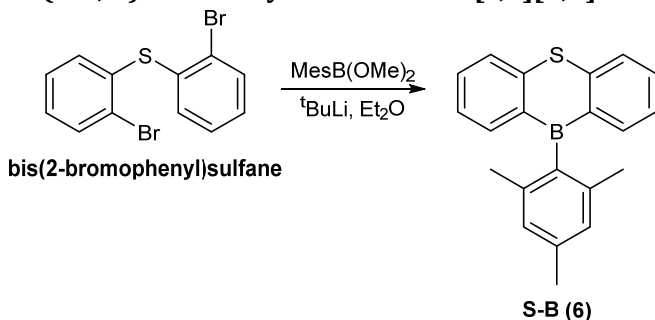

$t\text{BuLi}$  (1.9M pentane solution, 0.667 mL, 1.267 mmol, 4.36 eq.) was added to a solution of bis(2-bromophenyl)sulfane (100 mg, 0.2906 mmol, 1 eq.) in  $\text{Et}_2\text{O}$  (2 mL) at  $-78^\circ\text{C}$ . After stirring for 30 min at  $-78^\circ\text{C}$ ,  $\text{MesB(OMe)}_2$  (77 mg, 0.4011 mmol, 1.38 eq.) in  $\text{Et}_2\text{O}$  (3 mL) was added to the reaction mixture. The reaction mixture was stirred at r.t. overnight and the reaction was quenched with water.

The organic layer was extracted with  $\text{CHCl}_3$  and dried over anhydrous  $\text{Na}_2\text{SO}_4$ . After removal of the solvent under reduced pressure, the residue was purified with flash column

chromatography (hexane) to afford 10-mesityl-10*H*-dibenzo[*b,e*][1,4]thiaborinine (S-B, **6**) as a pale yellow solid (45.67 mg, 43.51% yield).

- <sup>1</sup>H NMR (400 MHz, Chloroform-*d*) δ 7.88 (d, *J* = 7.7 Hz, 1H), 7.78 (d, *J* = 8.1 Hz, 1H), 7.62 (t, *J* = 7.5 Hz, 1H), 7.30 (t, *J* = 7.4 Hz, 1H), 6.95 (s, 1H), 2.41 (s, 2H), 1.93 (s, 3H).
- <sup>1</sup>H NMR (500 MHz, DMSO-*d*<sub>6</sub>) δ 7.94 (d, *J* = 8.1 Hz, 2H), 7.79 – 7.70 (m, 5H), 7.42 (t, *J* = 7.4 Hz, 2H), 6.94 (s, 2H), 2.34 (s, 3H), 1.83 (s, 6H).
- <sup>13</sup>C NMR (126 MHz, DMSO-*d*<sub>6</sub>) δ 143.90, 139.28, 138.10, 136.71, 133.42, 127.50, 126.04, 125.68, 23.00, 21.33.

#### ▪ 1,2-bis(2-phenoxyphenyl)diselane

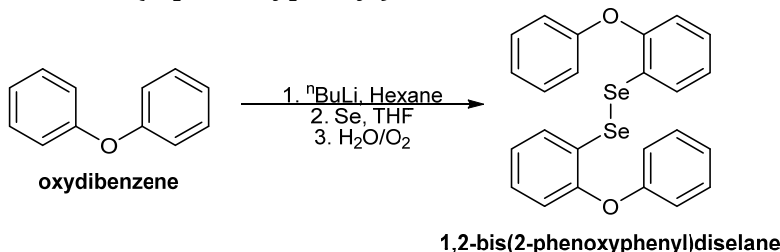

(adopted and modified from ref 3.)

1. To a solution of oxydibenzene (1.532 g, 9 mmol, 1eq.) in anhydrous hexane (25 mL), a 2.5 M solution of *n*-BuLi (9 mmol, 3.7 mL) in hexane was added dropwise at 0 °C and the reaction mixture was kept at this temperature for about 3 h with stirring. The reaction mixture was slowly warmed up to room temperature and it was left under stirring overnight.

2. The solvent was removed in vacuum and the remaining oil was dissolved in THF (20 mL). Afterwards, the stoichiometric amount of Se (710.64 mg, 9 mmol, 1eq.) was added and the solution became deep brown.

3. The reaction mixture was stirred for additional 2 h and then water was added (under argon) and subsequently the solution was exposed to air. The solvent was removed in vacuo and the remaining solid was dissolved in DCM (25 mL). The organic phase was washed with water and dried over anhydrous Na<sub>2</sub>SO<sub>4</sub> to afford 1,2-bis(2-phenoxyphenyl)diselane as a red oil which turned into a solid after storage in freezer (2.076 g, 92.93% yield).

- <sup>1</sup>H NMR (700 MHz, Chloroform-*d*) δ 7.69 (d, *J* = 7.9 Hz, 2H), 7.34 (t, *J* = 7.5 Hz, 4H), 7.18 (t, *J* = 7.7 Hz, 2H), 7.12 (t, *J* = 7.4 Hz, 2H), 7.02 (dd, *J* = 21.5, 8.0 Hz, 6H), 6.83 (d, *J* = 8.1 Hz, 2H).
- <sup>77</sup>Se NMR (134 MHz, Chloroform-*d*) δ 354.66.

#### ▪ (Se-O, 3) Phenoxaselenine

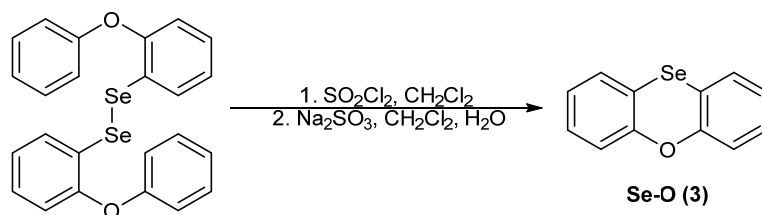

**1,2-bis(2-phenoxyphenyl)diselane**

(adopted and modified from ref 3.)

1. To a solution of 1,2-bis(2-phenoxyphenyl)diselane (0.335 g, 0.675 mmol) in anhydrous DCM (10 mL), a 1 M solution of  $\text{SO}_2\text{Cl}_2$  in  $\text{CH}_2\text{Cl}_2$  (0.675 mL, 0.675 mmol) was added dropwise and the solution grew from light yellow to brown. The solution was left stirred for 2 days, and the color gradually changed back to yellow. After removal of all volatiles at reduced pressure, the remaining intermediate solid was washed with anhydrous hexane and dried.

2. To a solution of the intermediate in DCM (15 mL),  $\text{Na}_2\text{SO}_3$  (0.0206 g, 0.16 mmol) in  $\text{H}_2\text{O}$  (15 mL) was added. The solution was stirred for 3 h. The organic phase was separated and dried over anhydrous  $\text{Na}_2\text{SO}_4$ , filtered, and concentrated at reduced pressure to afford phenoxaselenine (Se-O, **3**) as a white solid (135 mg, 31.5% yield).

- $^1\text{H}$  NMR (500 MHz, Chloroform-d)  $\delta$  7.30 (d,  $J = 7.6$  Hz, 2H), 7.20 (t,  $J = 7.7$  Hz, 2H), 7.12 (d,  $J = 8.0$  Hz, 2H), 7.04 (t,  $J = 7.4$  Hz, 2H).
- $^1\text{H}$  NMR (500 MHz, DMSO-d<sub>6</sub>)  $\delta$  7.47 (dd,  $J = 7.7, 1.4$  Hz, 1H), 7.30 – 7.24 (m, 1H), 7.18 (dd,  $J = 8.1, 1.1$  Hz, 1H), 7.12 (td,  $J = 7.5, 1.2$  Hz, 1H).
- $^{13}\text{C}$  NMR (126 MHz, DMSO-d<sub>6</sub>)  $\delta$  152.68, 130.24, 129.11, 125.87, 118.96, 116.33.
- $^{77}\text{Se}$  NMR (134 MHz, Chloroform-d)  $\delta$  256.69.

## II. Computational Details

The RAS-SF method is programmed in the Q-Chem 5.0 software package,<sup>9</sup> and the SOC computations are implemented in a development version of Q-Chem. All RAS-SF calculations were performed with the polarized, triple-zeta def2-TZVP basis set<sup>10,11</sup> and the RIMP2-cc-pVTZ auxiliary basis.<sup>11</sup> RAS-SF hole, particle calculations with 4 electron in 4 orbital active spaces were carried out with RAS1 and RAS3 subspaces including all occupied and virtual orbitals, respectively. Unless otherwise stated, the core electrons were kept frozen. Reference orbitals for RAS-SF were obtained from restricted open-shell density functional theory (RODFT) using the B3LYP functional in the triplet state. Geometries of the molecules were optimized at the ground state using  $\omega$ B97X-D functional<sup>12,13</sup> and the def2-TZVP basis set<sup>10,11</sup>. Calculations of SOC constants utilize general libraries developed for SOC calculations within EOM-CC.<sup>14</sup> Spin-orbit NTOs were computed and analyzed using the libwfa library.<sup>15</sup> The NTOs with the largest singular values, for each compound, were plotted using Gabedit program.<sup>16</sup>



### III. Reduced SOCME in the selected orientations

**Table S1.** Reduced SOCME in the selected orientations between  $S_0$  and  $T_1$  states

| Orientation | $L_x$ or $L_-$    | $L_z$ or $L_0$ | $L_y$ or $L_+$    |
|-------------|-------------------|----------------|-------------------|
| S-O         | 14.8229+2.0238i   | 0.00           | 14.8229-2.0238i   |
| Se-O        | 272.7789+45.2145i | 0.00           | 272.7789-45.2145i |
| S-N         | -10.50-6.02i      | 0.00           | -10.50+6.02i      |
| Se-N        | -137.56+0.01i     | -78.77i        | -137.56-0.01i     |
| S-B         | -0.0390i          | 0.00           | 0.0399i           |
| Se-B        | -0.0002+0.0908i   | 0.00           | -0.0002-0.0908i   |
| S-CO        | 0.00              | 0.0001i        | 0.00              |
| Se-CO       | 0.0001+0.0485i    | 0.00           | 0.0001-0.0485i    |

**Table S2.** Reduced SOCME in the selected orientations between  $S_0$  and  $T_1$  states, for Se-N with varying dihedral angle

| Orientation | $L_x$ or $L_-$    | $L_z$ or $L_0$ | $L_y$ or $L_+$    |
|-------------|-------------------|----------------|-------------------|
| 10°         | 18.2431+0.0069i   | 3.8320i        | 18.2431-0.0069i   |
| 20°         | -37.2080+0.2711i  | 13.2820i       | -37.2080-0.2711i  |
| 30°         | -105.4036-0.0016i | -38.6745i      | -105.4036+0.0016i |
| 40°         | 173.2978-0.0001i  | 113.4250i      | 173.2978+0.0001i  |
| 50°         | 229.5948-0.0089i  | 223.7239i      | 229.5948+0.0089i  |
| 60°         | -264.4984+0.0081i | -372.0783i     | -264.4984-0.0081i |

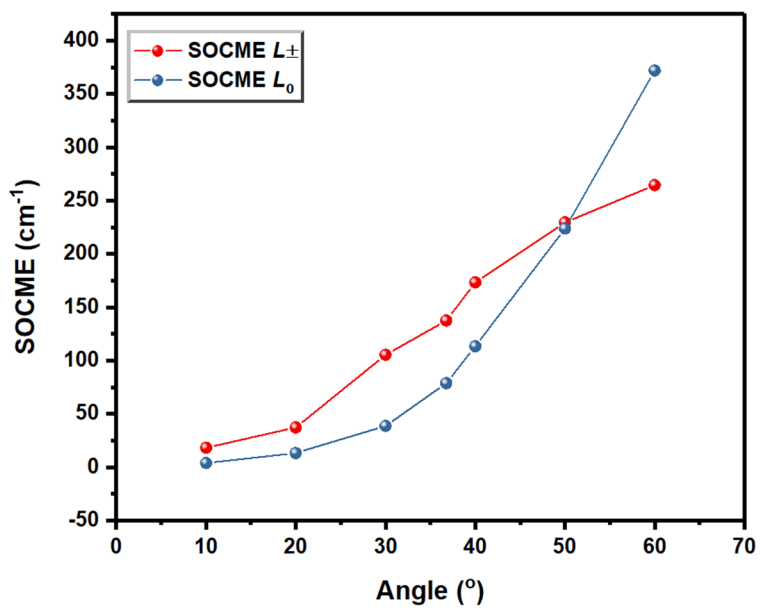

**Figure S1.** Reduced SOCME in the selected orientations between  $S_0$  and  $T_1$  states, for Se-N with varying dihedral angle (showing the modulus).

#### IV. Emission/excitation spectra

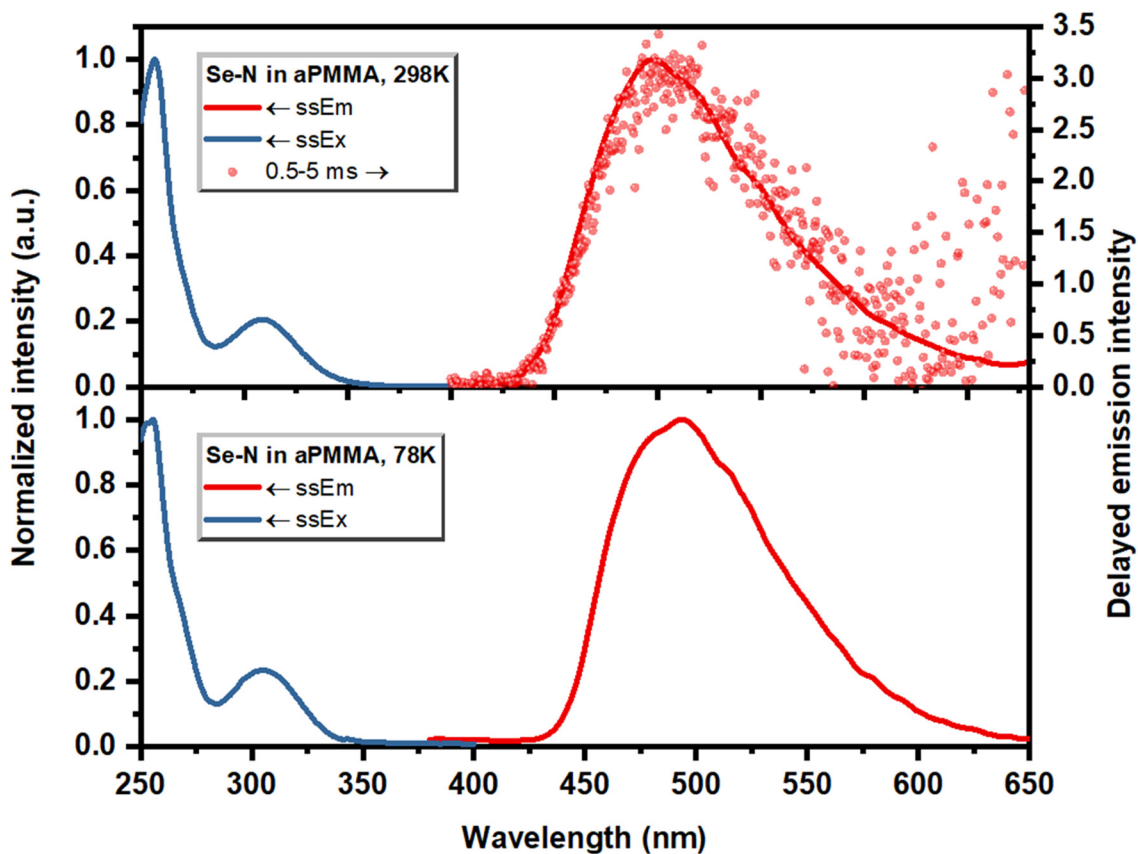

**Figure S2.** The emission and excitation spectra of Se-N (1 wt% in atactic PMMA matrix) at 298 K and 78 K measured in vacuum: steady state emission (red line), steady state excitation (blue line), and delayed emission (0.5-5 ms, red dot).

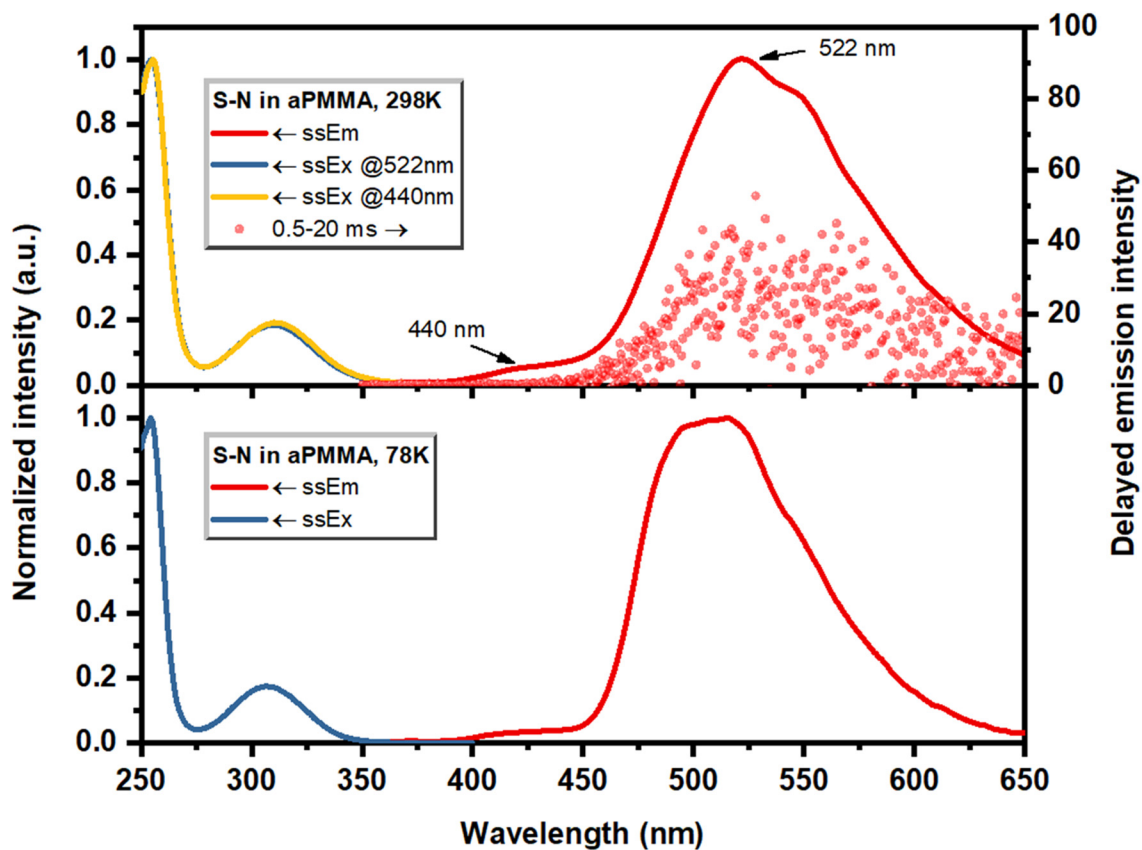

**Figure S3.** The emission and excitation spectra of S-N (1 wt% in atactic PMMA matrix) at 298 K and 78 K measured in vacuum: steady state emission (red line), steady state excitation (blue & yellow line), and delayed emission (0.5-5 ms, red dot).

The emission peak at 440 nm could either come from prompt fluorescence or delayed fluorescence.

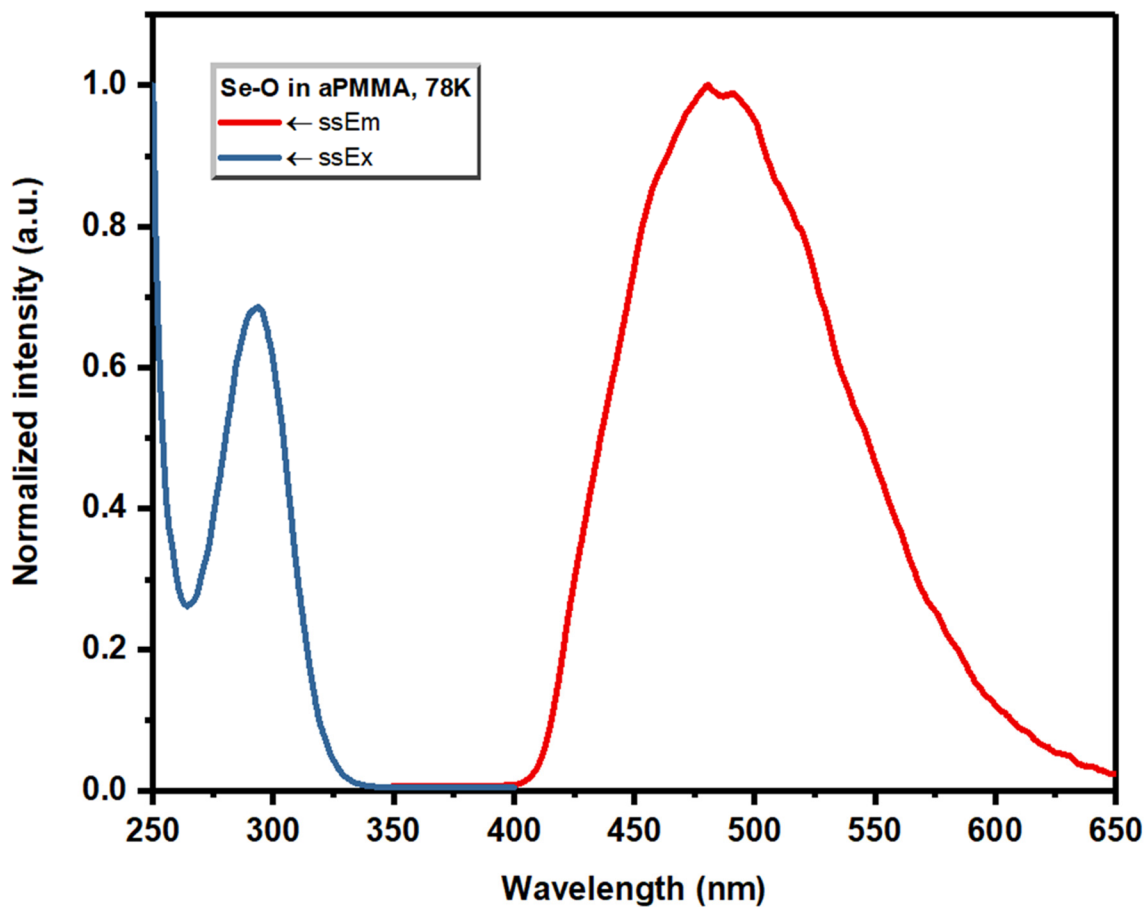

**Figure S4.** The emission and excitation spectra of Se-O (1 wt% in atactic PMMA matrix) at 78 K measured in vacuum: steady state emission (red line) and steady state excitation (blue line). The emission at 298 K was very weak, and thus it wasn't shown here.

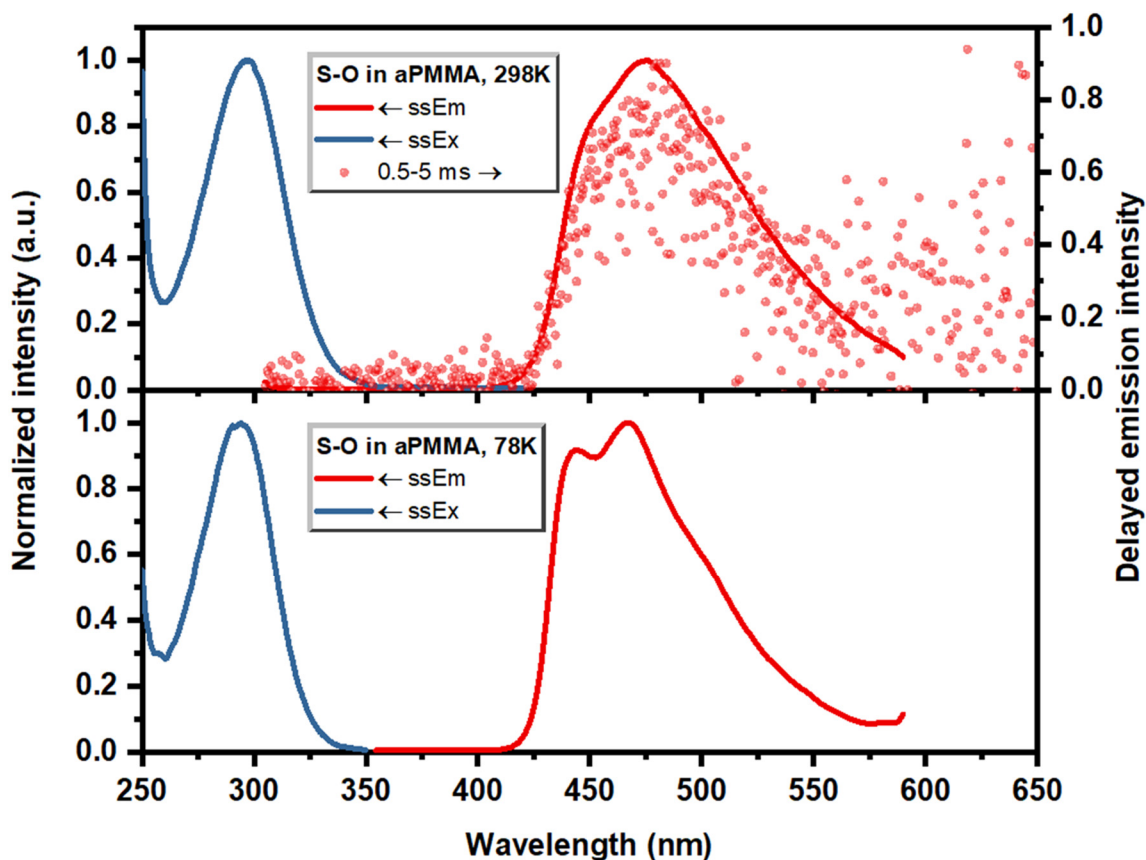

**Figure S5.** The emission and excitation spectra of S-O (1 wt% in atactic PMMA matrix) at 298 K and 78 K measured in vacuum: steady state emission (red line), steady state excitation (blue line), and delayed emission (0.5-5 ms, red dot).

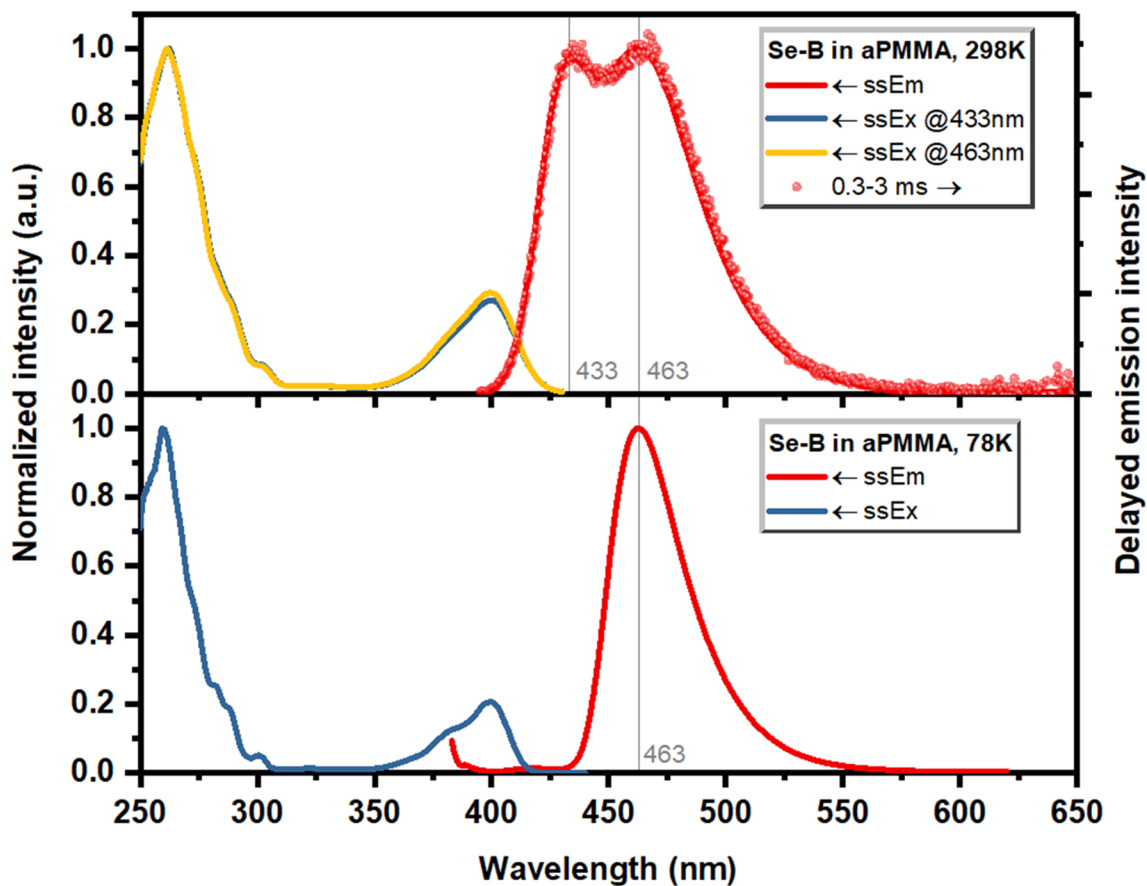

**Figure S6.** The emission and excitation spectra of Se-B (1 wt% in atactic PMMA matrix) at 298 K and 78 K measured in vacuum: steady state emission (red line), steady state excitation (blue & yellow line), and delayed emission (0.5-5 ms, red dot).

The emission peak at 433 nm (298 K) is from delayed fluorescence since it stayed the same relative intensity in the delayed spectrum, and disappeared at 78 K.

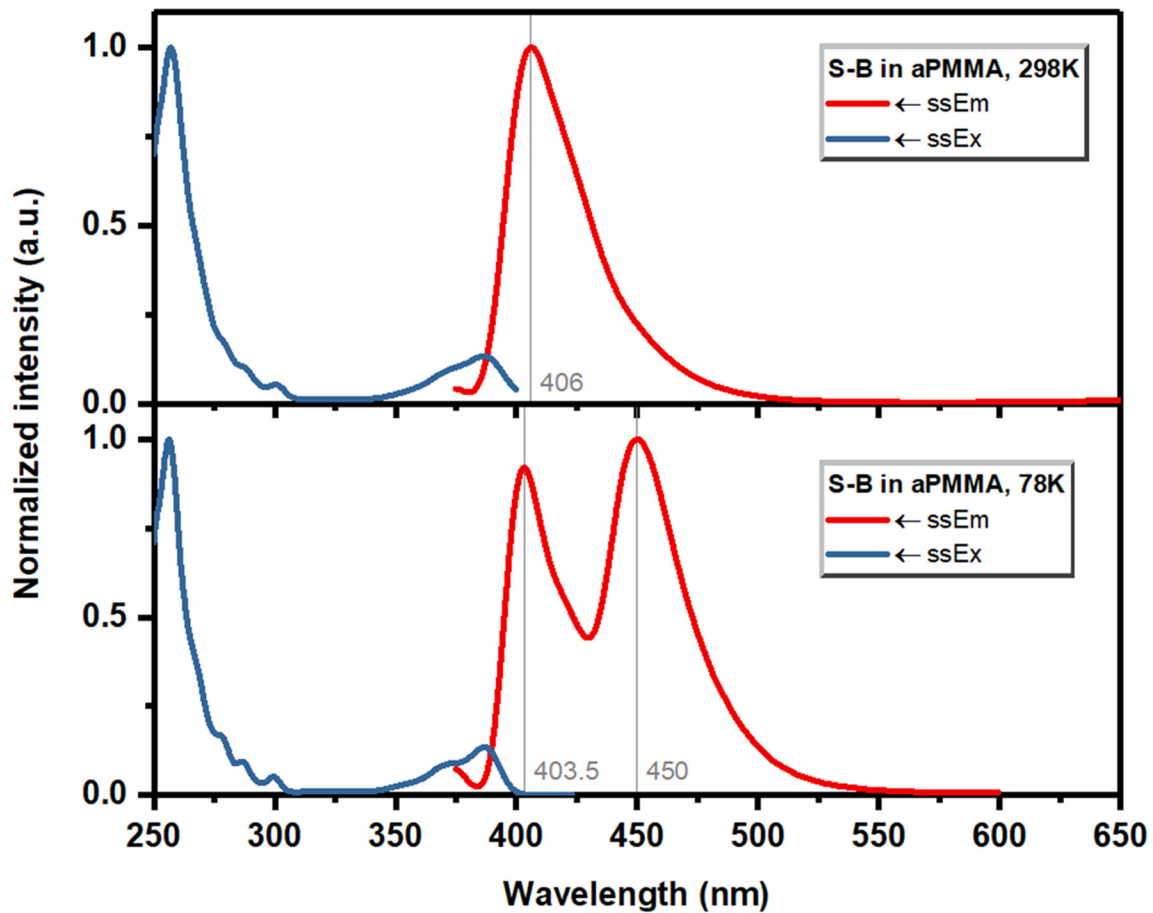

**Figure S7.** The emission and excitation spectra of S-B (1 wt% in atactic PMMA matrix) at 298 K and 78 K measured in vacuum: steady state emission (red line) and steady state excitation (blue line).

The emission peak at 406 nm (298 K) or 403.5 nm (78K) should have certain delayed fluorescence character.



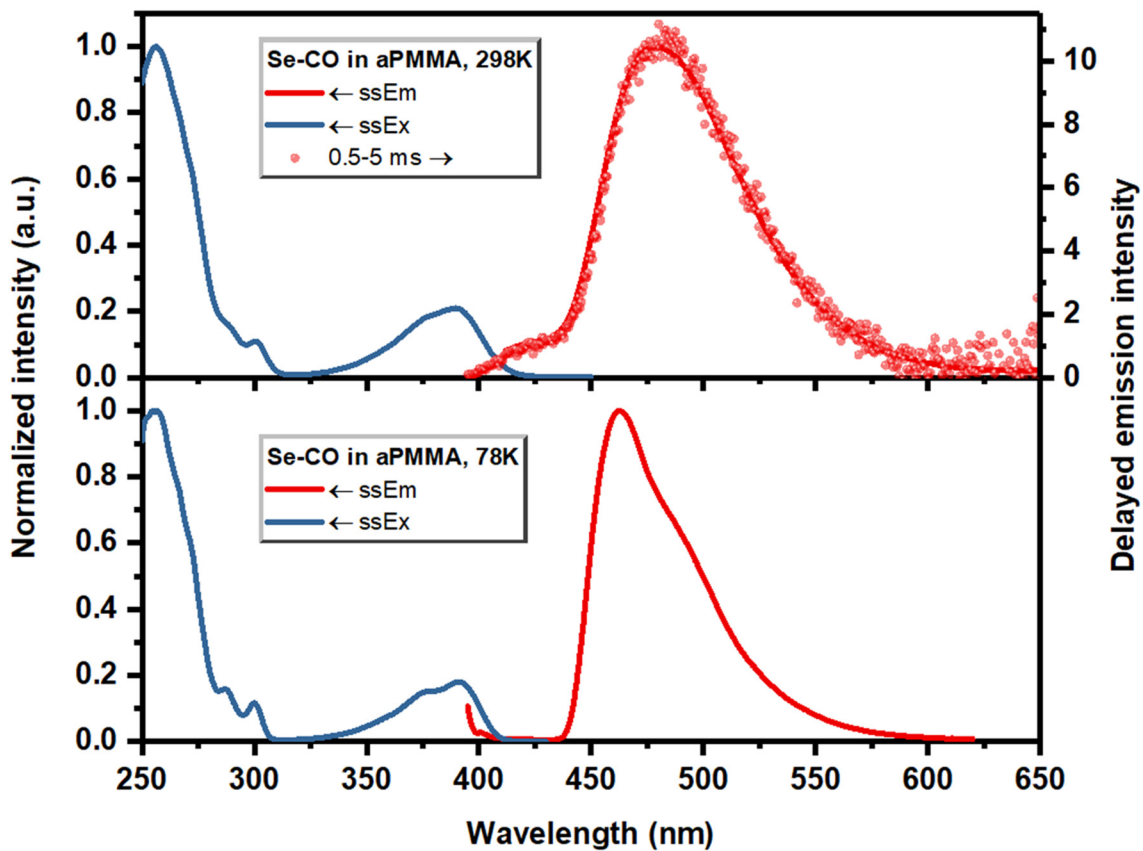

**Figure S8.** The emission and excitation spectra of Se-CO (1 wt% in atactic PMMA matrix) at 298 K and 78 K measured in vacuum: steady state emission (red line), steady state excitation (blue line), and delayed emission (0.5-5 ms, red dot).

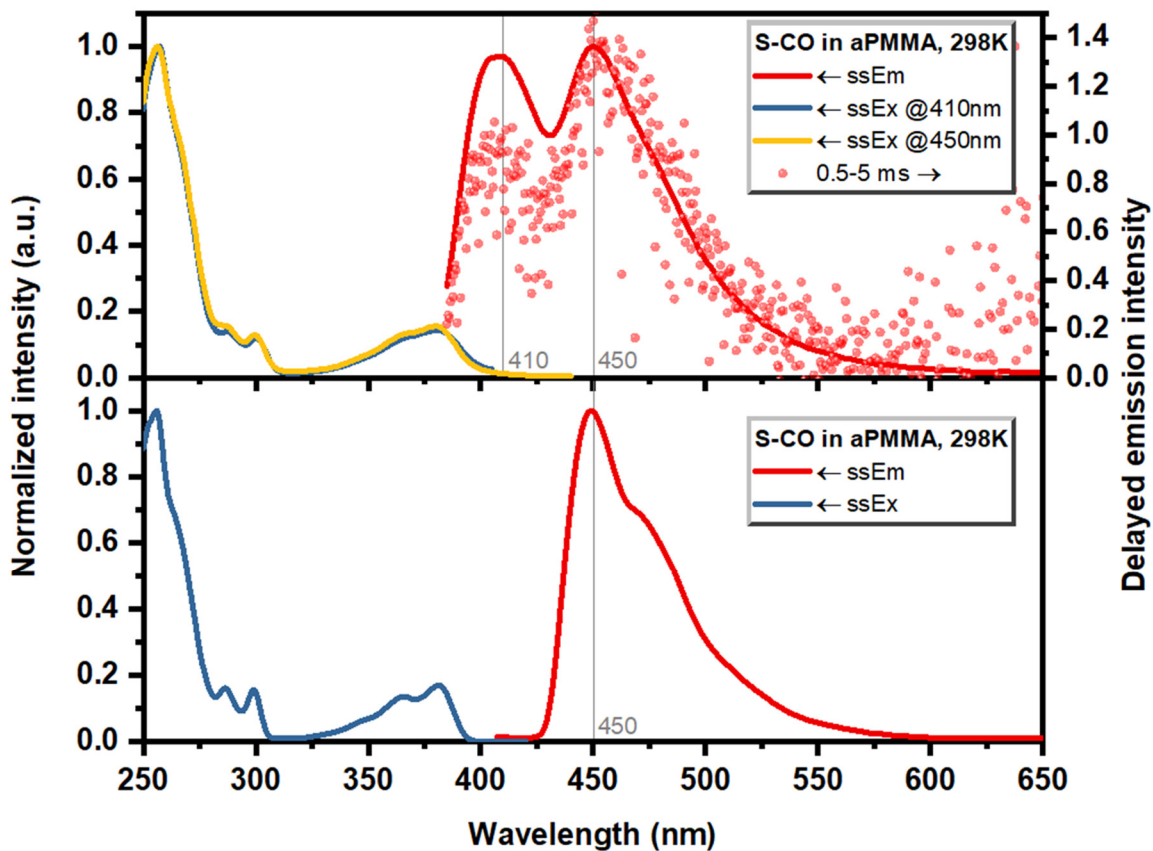

**Figure S8.** The emission and excitation spectra of Se-CO (1 wt% in atactic PMMA matrix) at 298 K and 78 K measured in vacuum: steady state emission (red line), steady state excitation (blue & yellow line), and delayed emission (0.5-5 ms, red dot).

The emission peak at 410 nm (298 K) should have certain delayed fluorescence character since it stayed the same relative intensity in the delayed spectrum, and disappeared at 78 K.

## V. Additional lifetime information

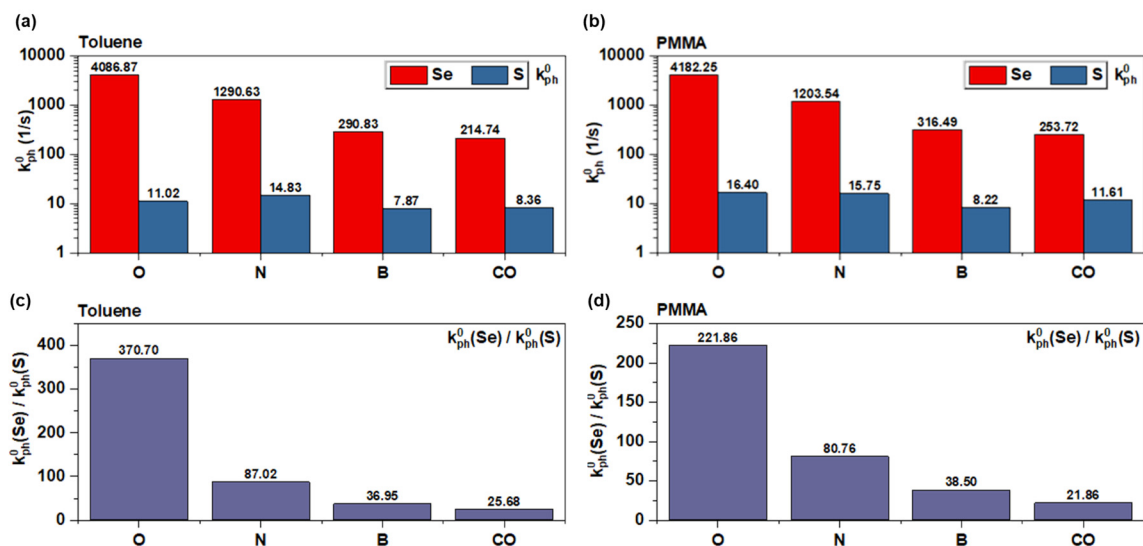

**Figure S9.** The experimental intrinsic phosphorescence rate  $k_{ph}^0$  measured in (a) toluene and (b) in doped PMMA matrix at 78 K, and the  $k_{ph}^0(\text{Se derivative})/k_{ph}^0(\text{S derivative})$  value of each functional group in (c) toluene and (d) in doped PMMA matrix at 78 K.

The general trend where  $k_{ph}^0$  or SOCMEs decrease with decreasing dihedral angle is clearly observed in the Se compounds. In the sulfur series, the general trend in  $k_{ph}^0$  still follows prediction in that a sharp drop in dihedral angle from Se-O/N to Se-B/CO has led to obvious reduction in  $k_{ph}^0$ . This leaves just one case, the  $k_{ph}^0$  of S-CO, which is higher than that of S-B and therefore does not fit the trend.

We presume two plausible reasons. First, sulfur is not a heavy atom and due to the intrinsically lower SOCME, S derivatives will be more prone to non-radiative decay than their Se counterparts. This deactivation pathway comes from both the compound itself and its interaction with the matrices. Thus, the varying non-radiative decay rate from S-O, S-N to S-B and S-CO could lead to the deviation from the predicted  $T_1$ - $S_0$  SOCME trend.

Second, experimental dihedral angles of the two CO compounds are likely shifted from their calculated value. This is very important particularly for planar molecules since a little distortion from complete planarity could lead to large gain in  $T_1$ - $S_0$  SOCME. For instance, the predicted  $T_1$ - $S_0$  SOCME for Se-CO is  $0.046 \text{ cm}^{-1}$  and  $1.04 \times 10^{-4} \text{ cm}^{-1}$  for S-CO, which should both lead to very long intrinsic phosphorescence lifetime or very low  $k_{ph}^0$ . However, the experimental results in PMMA at 78K suggested otherwise. For instance, Se-CO has a fast-than-predicted  $\tau_{ph}^0$  of 4.09 ms. Thus, we hypothesized that the experimental dihedral angle or more precisely,  $\Delta L$  in the CO series is non-negligible. Hence, the actual phosphorescence rate should be larger than the predicted value. To demonstrate these in experiments, we've compared the lifetimes of 8 compounds studied in dilute toluene solution with those in PMMA at 78K.

According to Figure S9, changing the matrix has inevitably changed the lifetime at 78K. This change is extremely large for S-CO which had  $k_{ph}^{78K}$  of 8.36 1/s in toluene v.s. 11.61 1/s in PMMA. S-CO and S-B now have similar lifetimes in toluene. We suspect that either non-radiative decay or dihedral angle change both due to interaction with the matrix may have led to the great lifetime change. Due to similar reasons, surprisingly, S-O presented similar large  $k_{ph}^{78K}$  change from PMMA to toluene. However, the overall lifetime trend is very obvious as predicted in the Se compounds, and hence the decreasing  $k_{ph}^0$  (Se derivative)/ $k_{ph}^0$  (S derivative) as shown in Figure S9c-d. It is less pronounced in the S compounds, but follows the general reducing trend from S-N/O to S-B/CO.

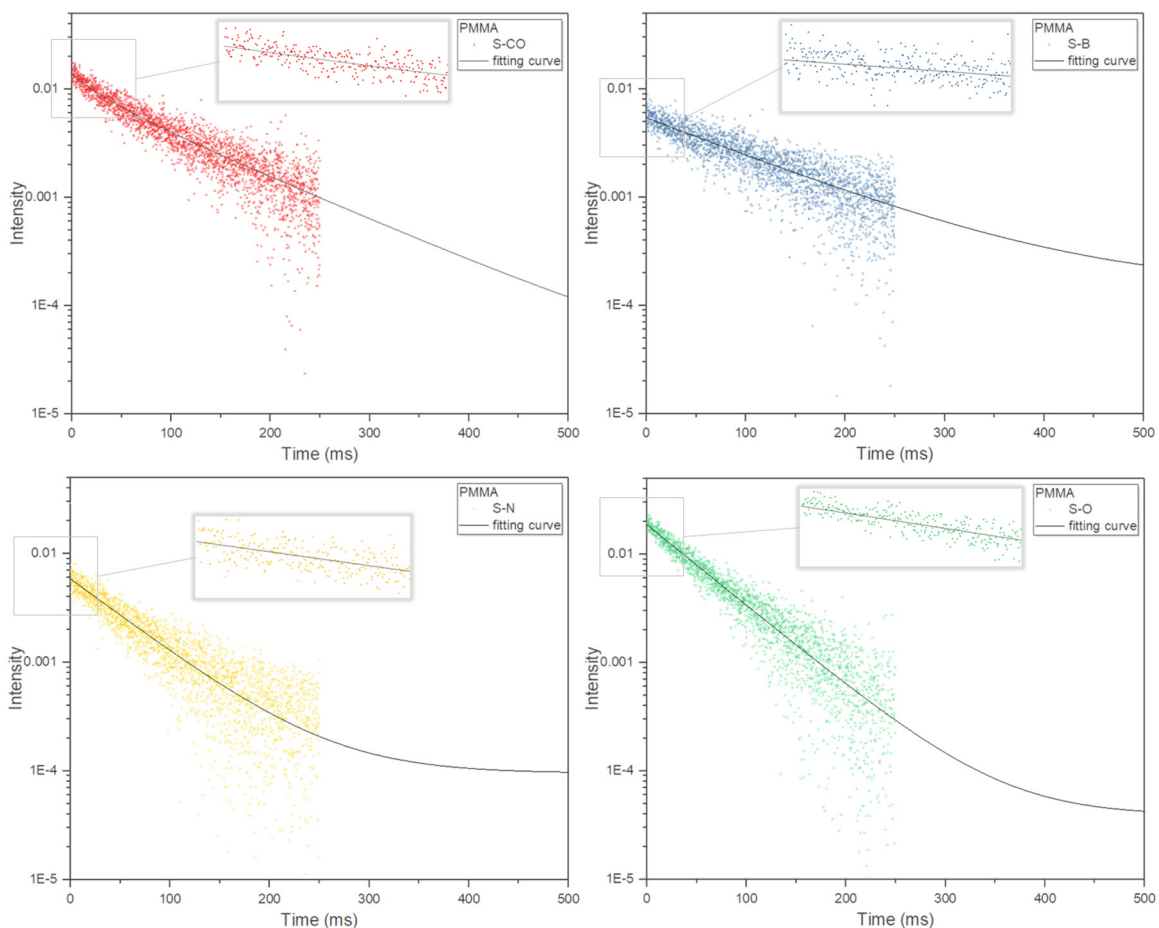

**Figure S10.** Photoluminescence decay of S-CO, S-B, S-N, and S-O in PMMA matrix measured at 78K. The fitting curve was included, which was done by Origin Lab software with its built-in exponential decay function. The raw decay data was recorded from 0 to 250 ms, while fitting was done using the data from 10 to 250 ms. The insets show the fitting in the head (1-30 ms). The head, body, and tail of the decay were all well-fitted, indicating good fitting quality.

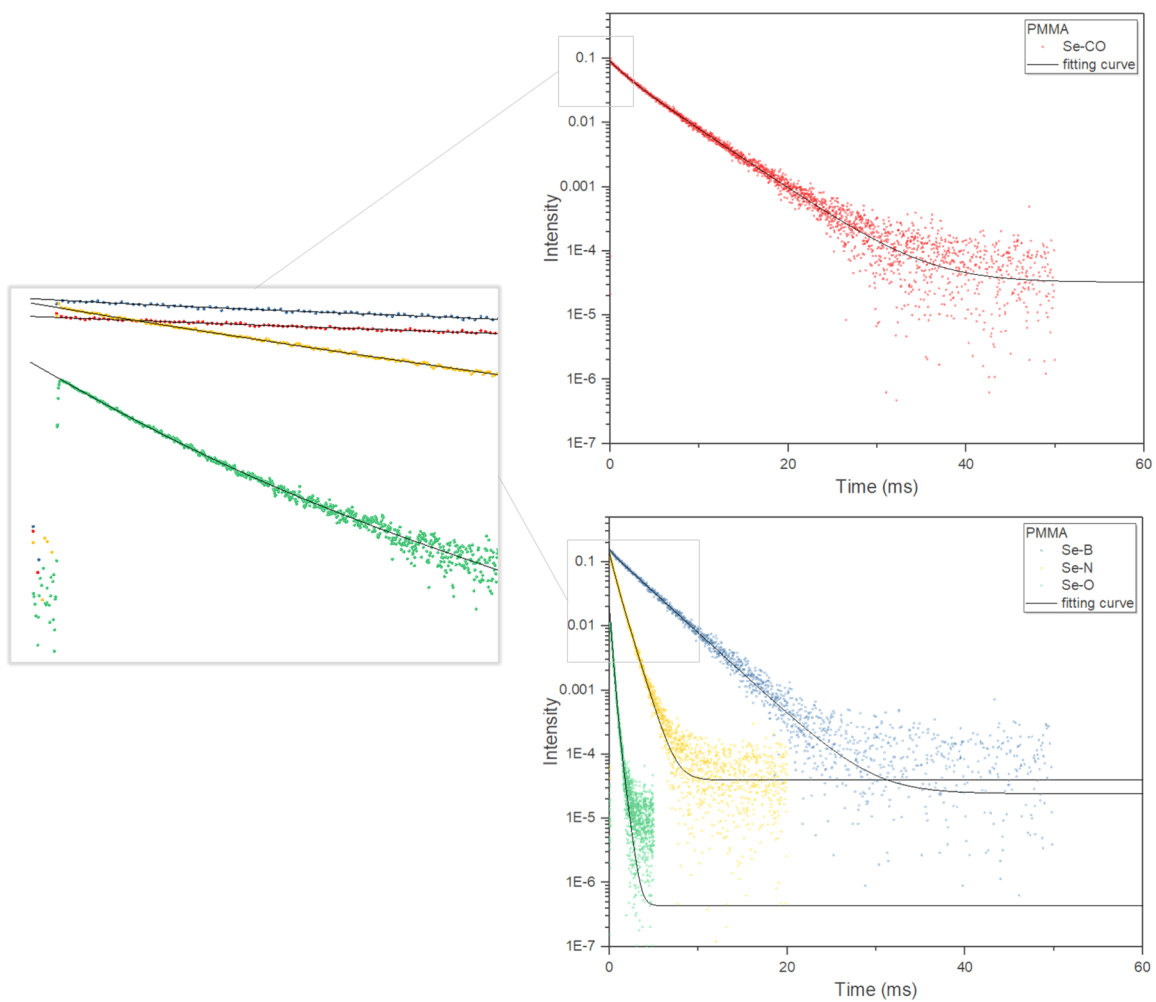

**Figure S11.** Photoluminescence decay of Se-CO, Se-B, Se-N, and Se-O in PMMA matrix measured at 78K. The fitting curve was included, which was done by Origin Lab software with its built-in exponential decay function. The raw decay data was recorded from 0 ms, while fitting was done using the data from 0.2 ms. The insets show the fitting in the head (0-2 ms). The head, body, and tail of the decay were all well-fitted, indicating good fitting quality.

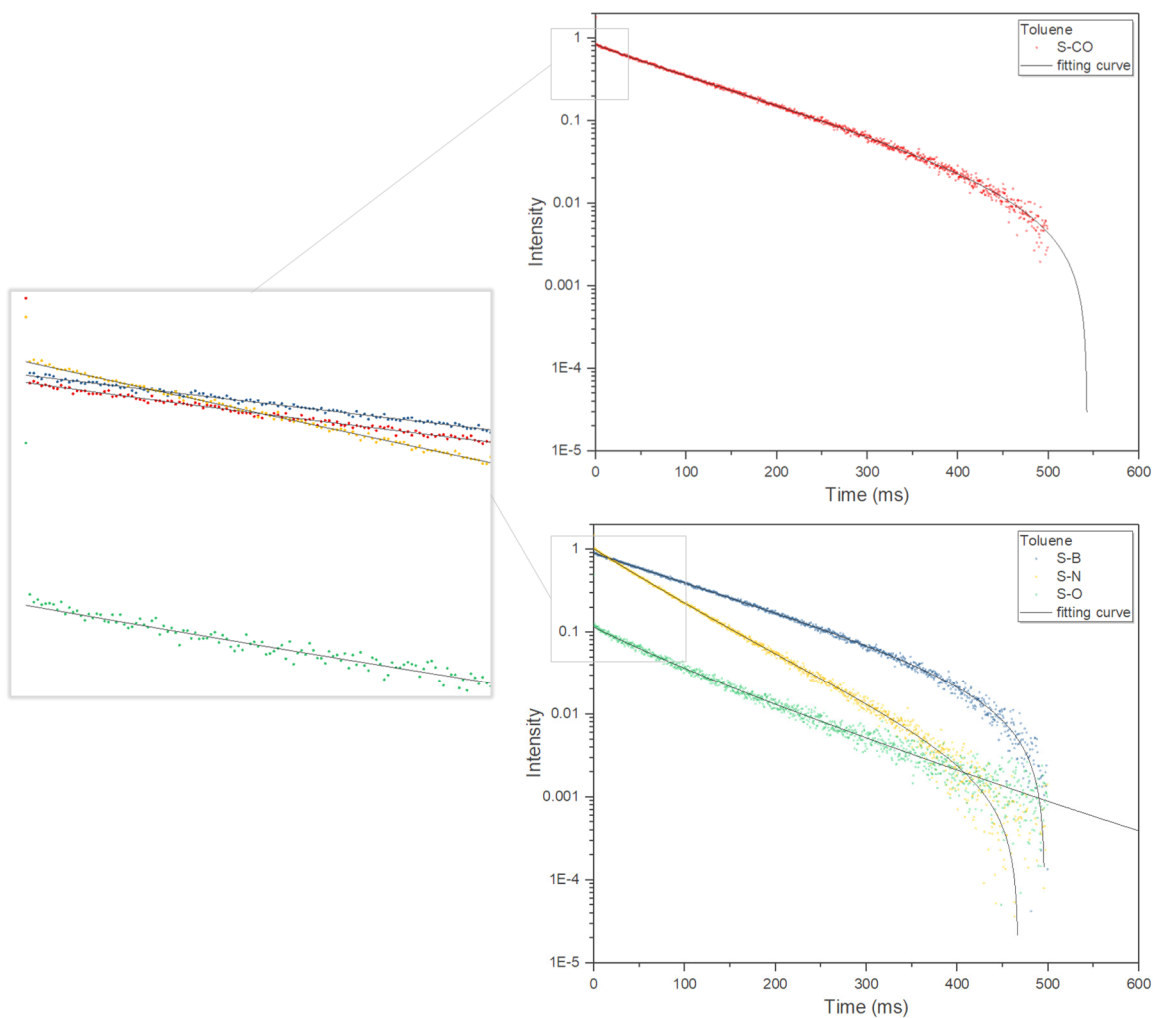

**Figure S12.** Photoluminescence decay of S-CO, S-B, S-N, and S-O in toluene measured at 78K. The fitting curve was included, which was done by Origin Lab software with its built-in exponential decay function. The raw decay data was recorded from 0-500 ms, while fitting was done using the data from 10 ms. The insets show the fitting in the head (0-60 ms). The head, body, and tail of the decay were all well-fitted, indicating good fitting quality.

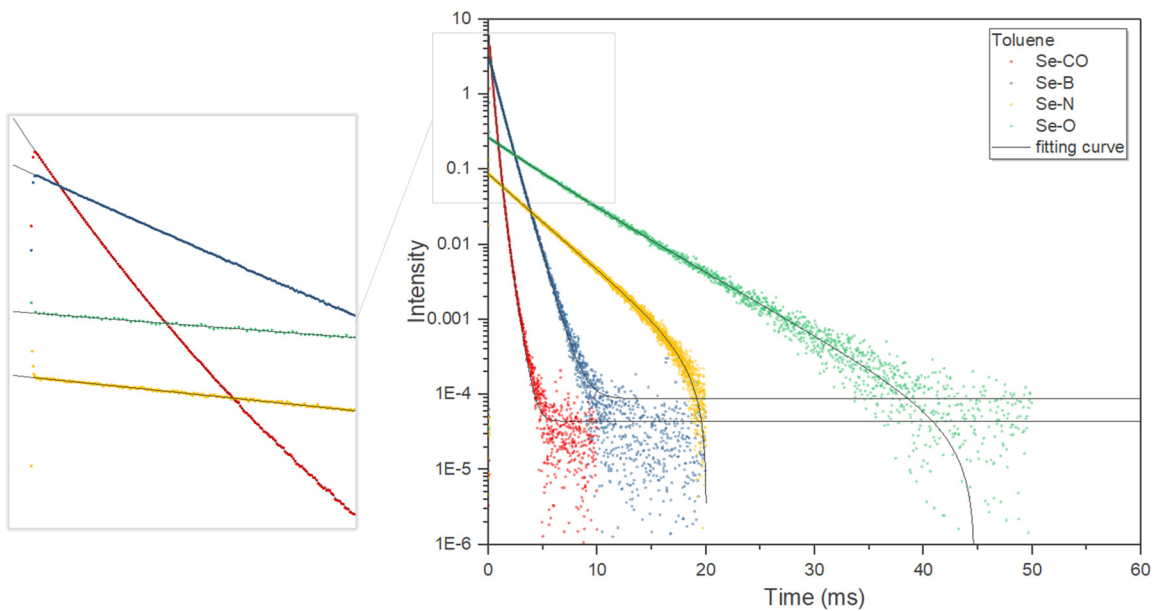

**Figure S13.** Photoluminescence decay of Se-CO, Se-B, Se-N, and Se-O in toluene measured at 78K. The fitting curve was included, which was done by Origin Lab software with its built-in exponential decay function. The raw decay data was recorded from 0 ms, while fitting was done using the data from 0.2 ms. The insets show the fitting in the head (0-2 ms). The head, body, and tail of the decay were all well-fitted, indicating good fitting quality.



## VI. NMR spectra

### ▪ (Se-N, 1) 10-methyl-10H-phenoselenazine

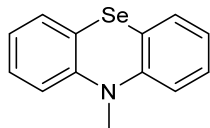

$^1\text{H}$  NMR (500 MHz, Chloroform- $d$ )

$\delta$  7.32 (dd,  $J = 7.5, 1.4$  Hz, 2H), 7.22 (td,  $J = 8.2, 1.4$  Hz, 2H), 6.97 – 6.90 (m, 4H), 3.44 (s, 3H).

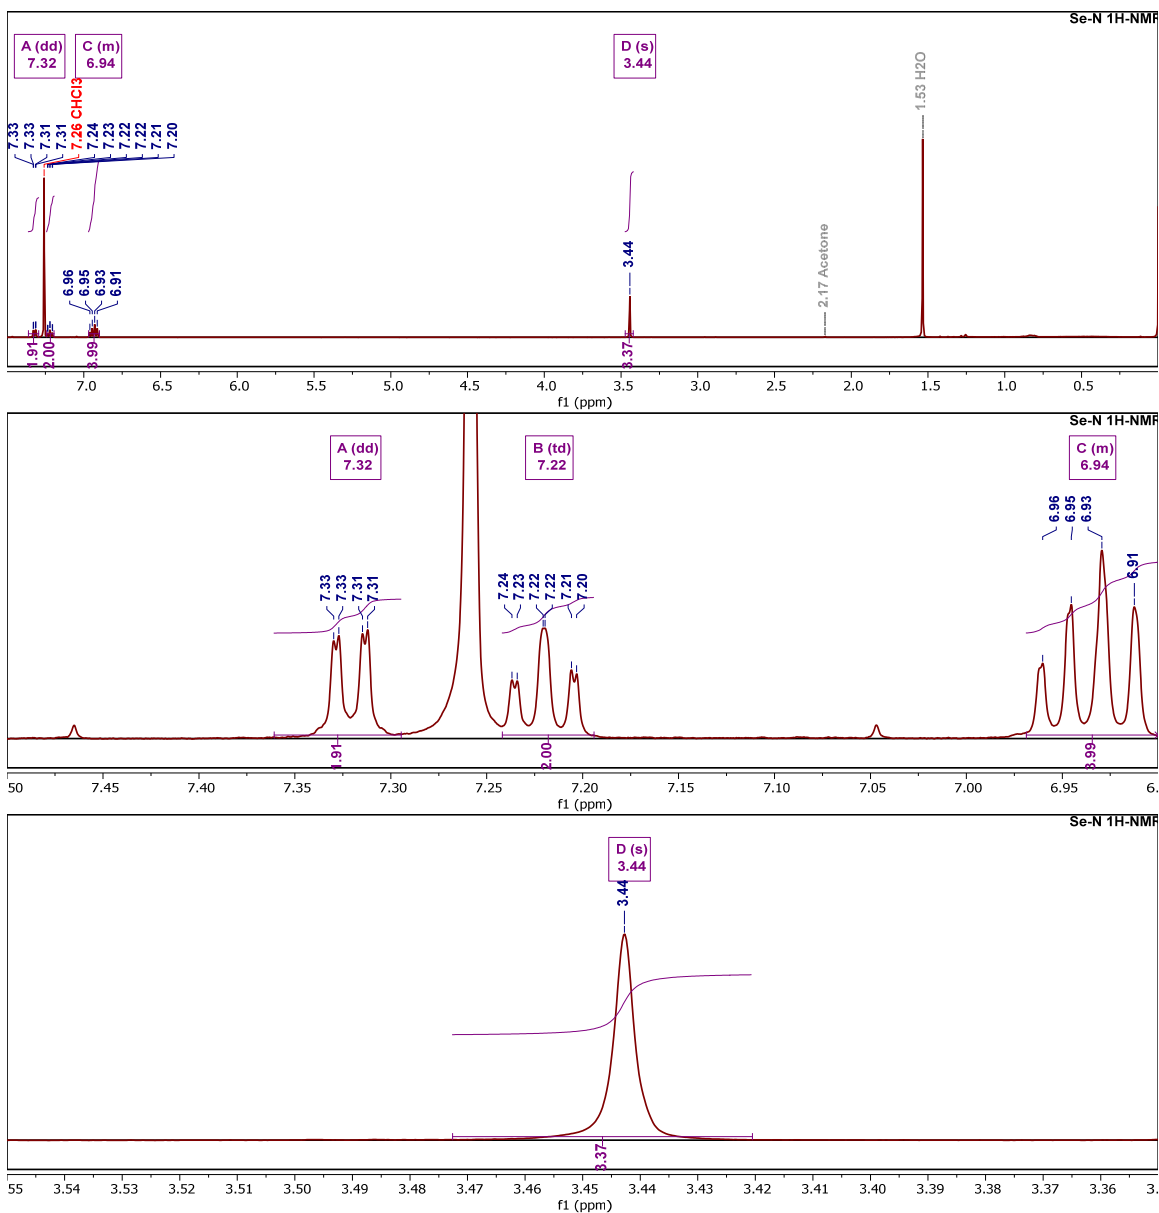

▪ (Se-N, 1) 10-methyl-10H-phenoselenazine

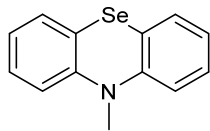

$^1\text{H NMR}$  (500 MHz, DMSO- $d_6$ )

$\delta$  7.34 (dd,  $J = 7.5, 1.3$  Hz, 2H), 7.29 – 7.23 (m, 2H), 7.03 (d,  $J = 8.1$  Hz, 2H), 7.00 – 6.94 (m, 2H), 3.36 (s, 3H).

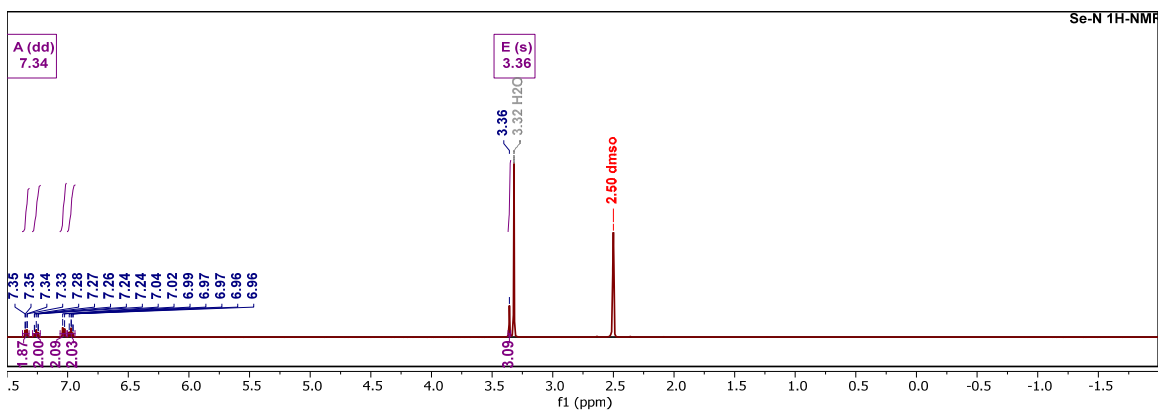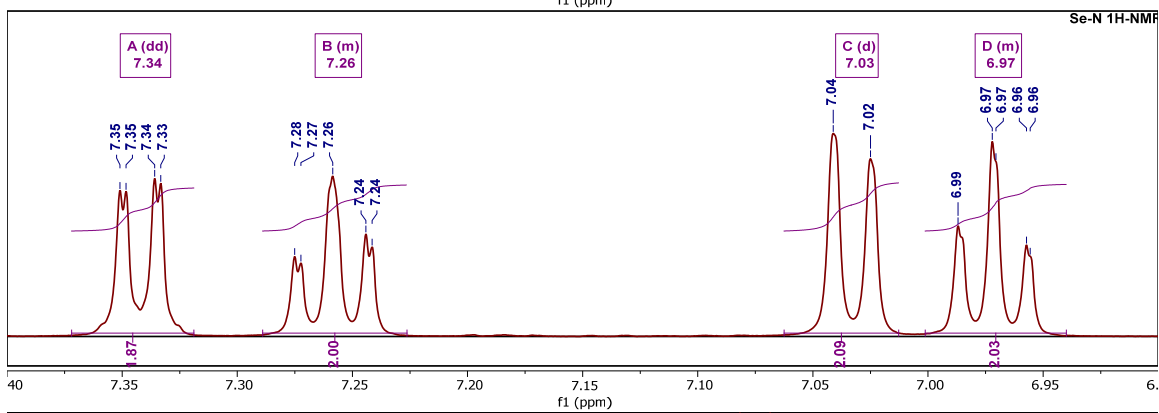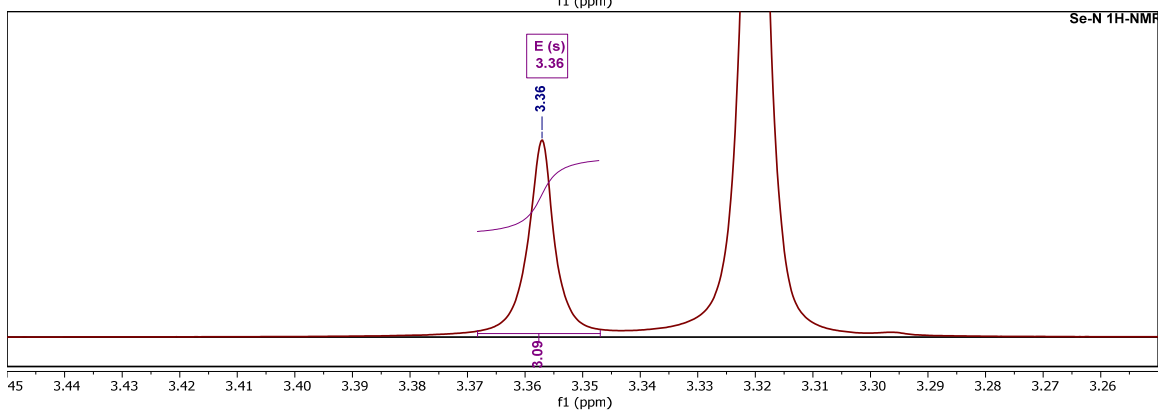

▪ (Se-N, 1) 10-methyl-10H-phenoselenazine

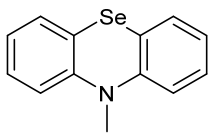

$^{13}\text{C}$  NMR (126 MHz, DMSO- $d_6$ )

$\delta$  145.86, 129.89, 128.37, 123.40, 119.30, 116.20, 37.12.

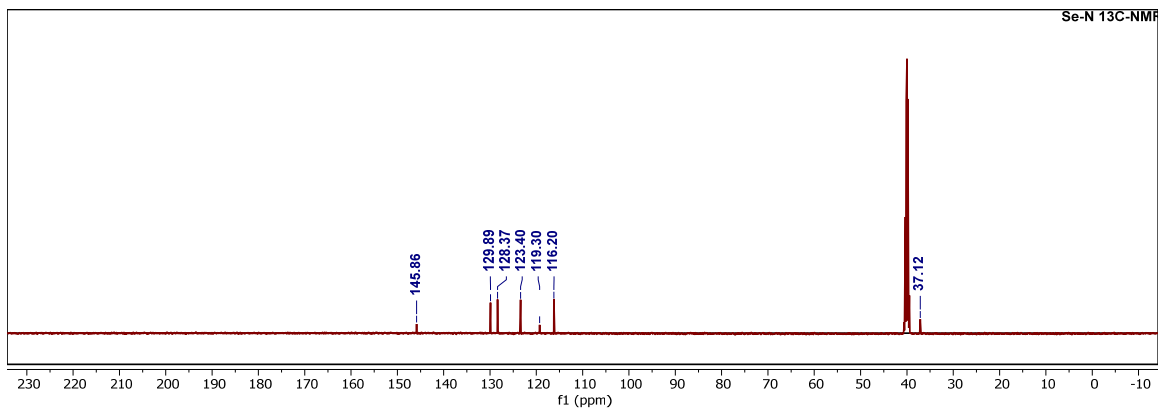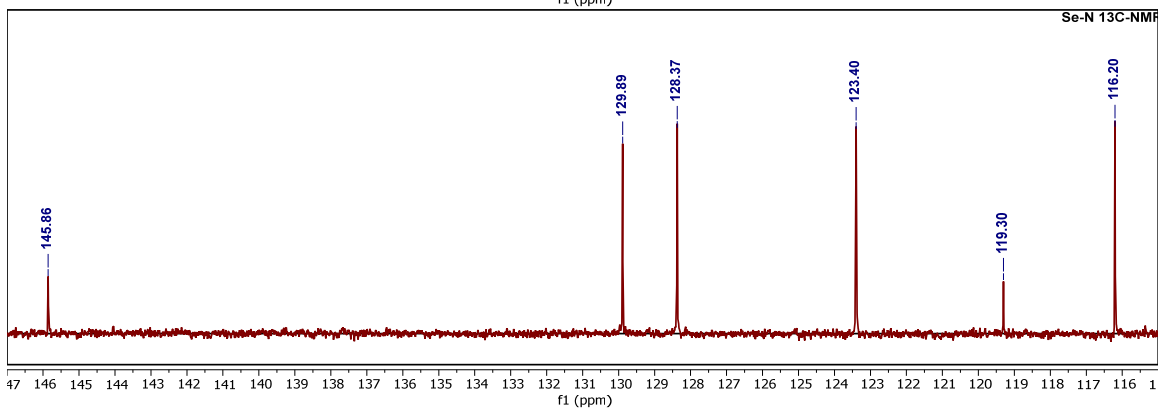

$^{77}\text{Se}$  NMR (134 MHz, DMSO- $d_6$ )

$\delta$  278.89.

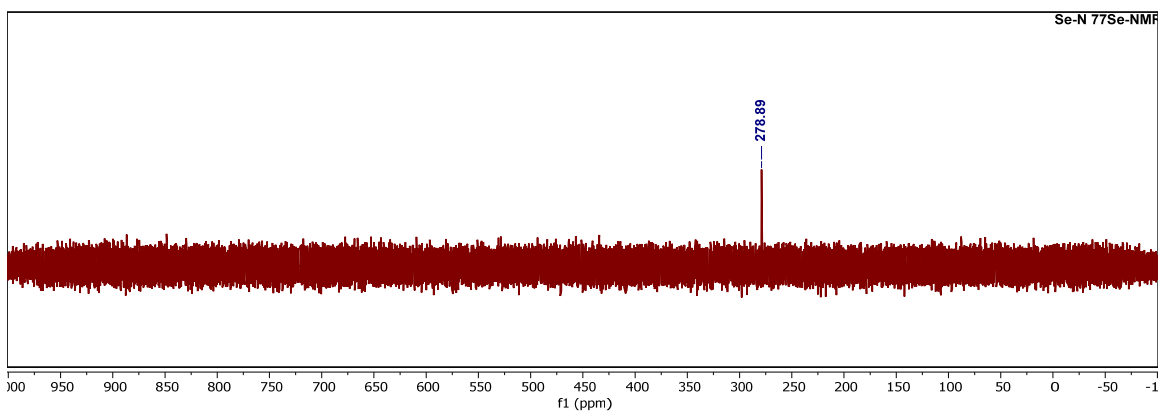

▪ (S-N, 2) 10-methyl-10H-phenothiazine

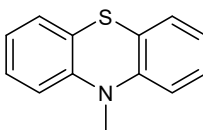

*<sup>1</sup>H NMR (401 MHz, Chloroform-d)*

$\delta$  7.21 – 7.10 (m, 4H), 6.98 – 6.88 (m, 2H), 6.82 (d,  $J = 8.1$  Hz, 2H), 3.38 (s, 3H).

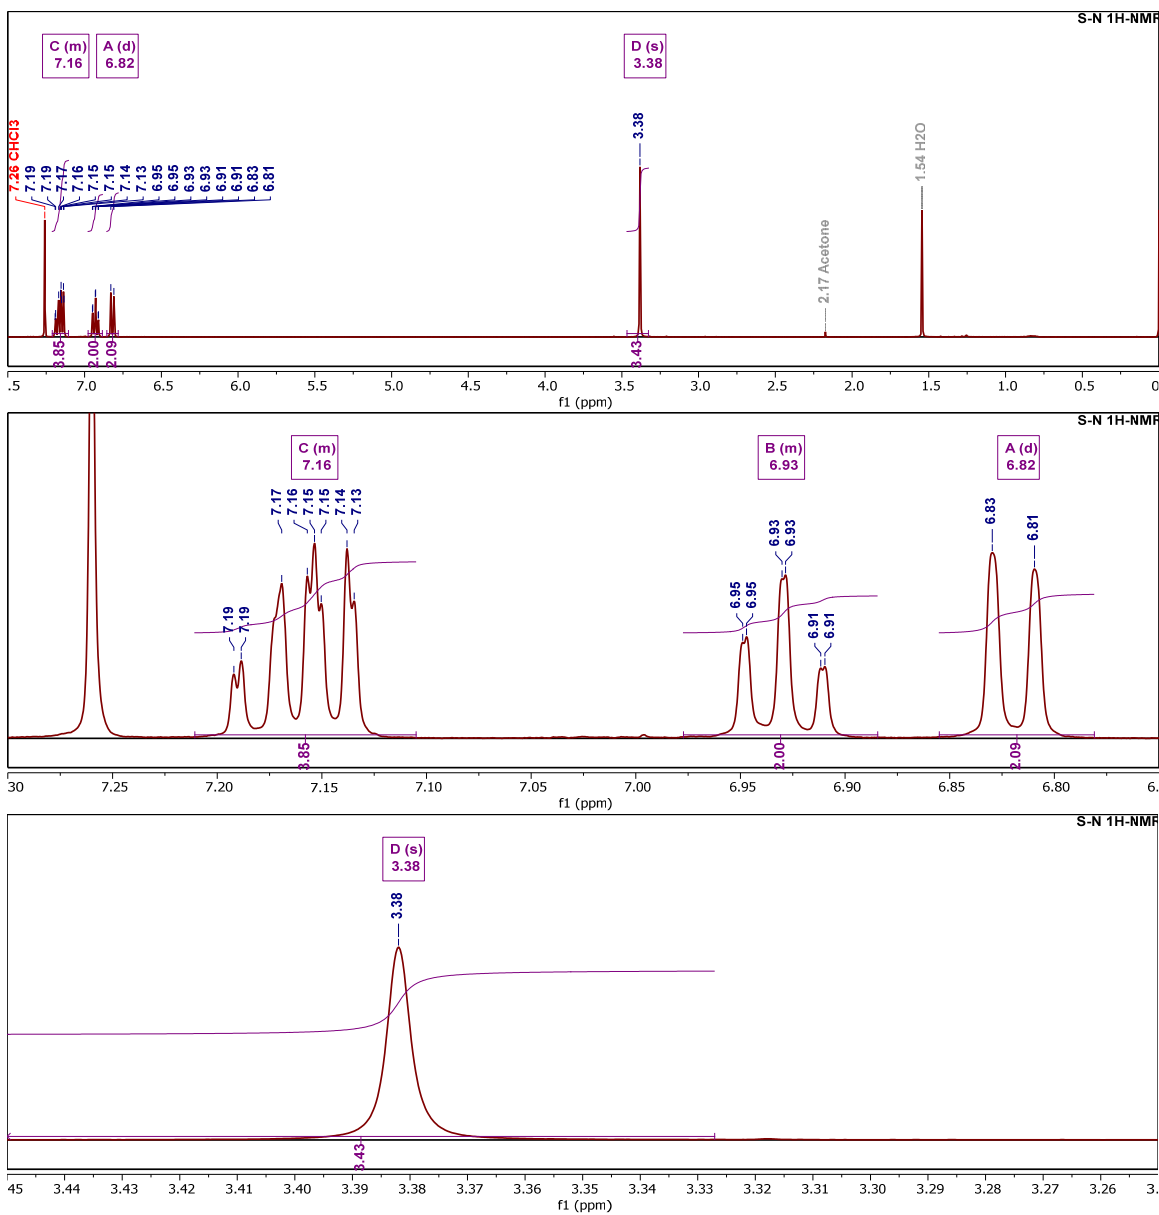

▪ (S-N, 2) 10-methyl-10H-phenothiazine

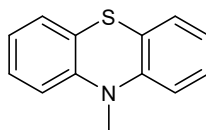

*<sup>1</sup>H NMR (500 MHz, DMSO-d<sub>6</sub>)*

$\delta$  7.24 – 7.19 (m, 2H), 7.15 (dd,  $J$  = 7.8, 1.0 Hz, 2H), 6.96 (t,  $J$  = 7.3 Hz, 4H), 3.30 (s, 3H).

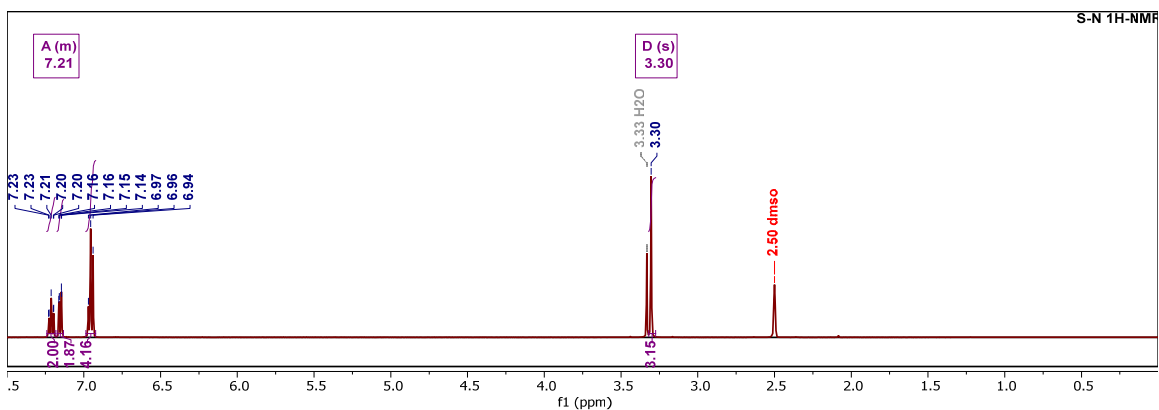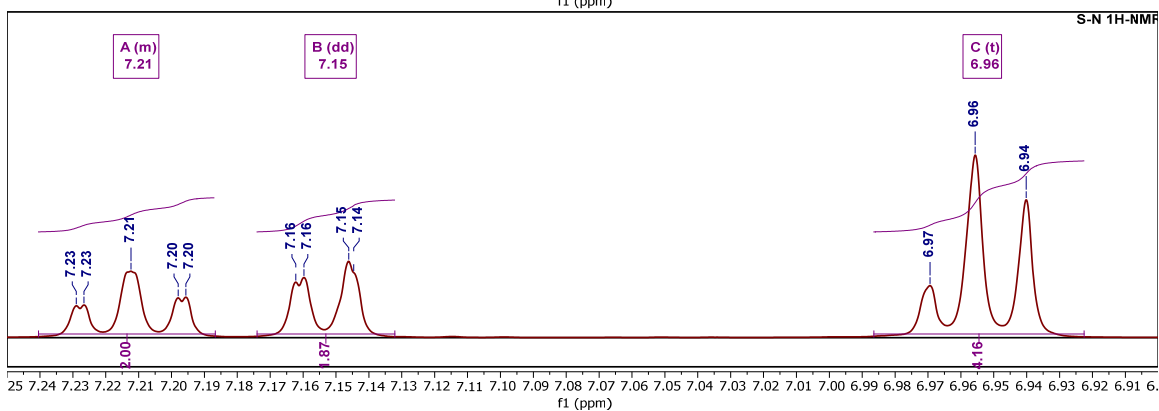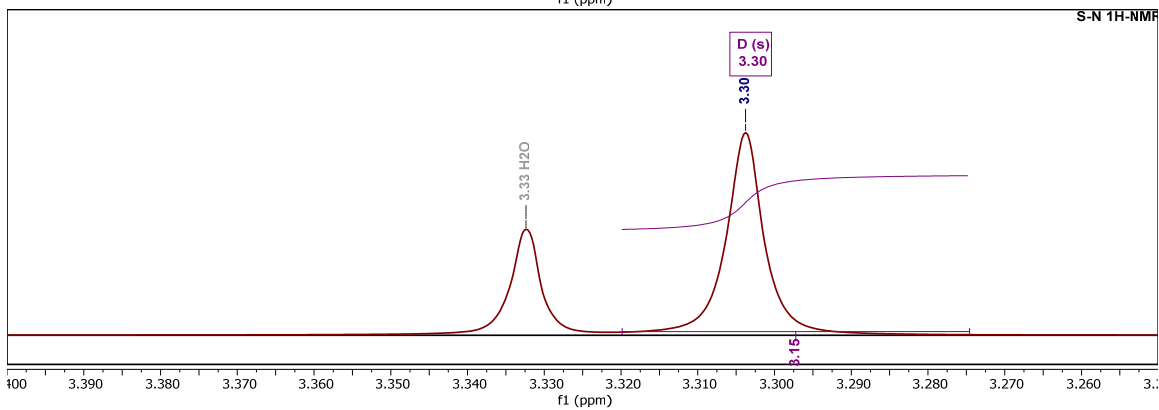

▪ (S-N, 2) 10-methyl-10H-phenothiazine

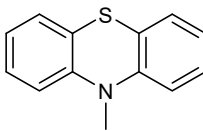

$^{13}\text{C}$  NMR (126 MHz, DMSO- $d_6$ )

$\delta$  145.78, 128.21, 127.22, 122.92, 122.53, 115.05, 35.56.

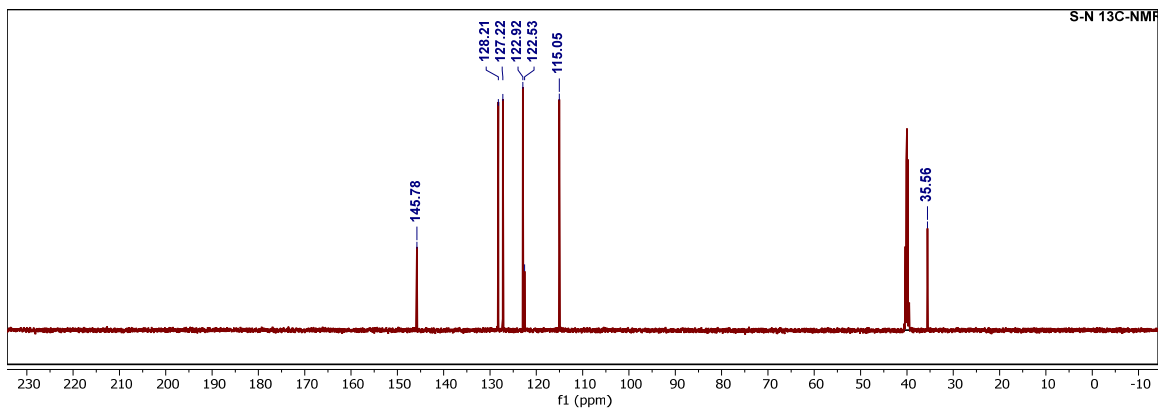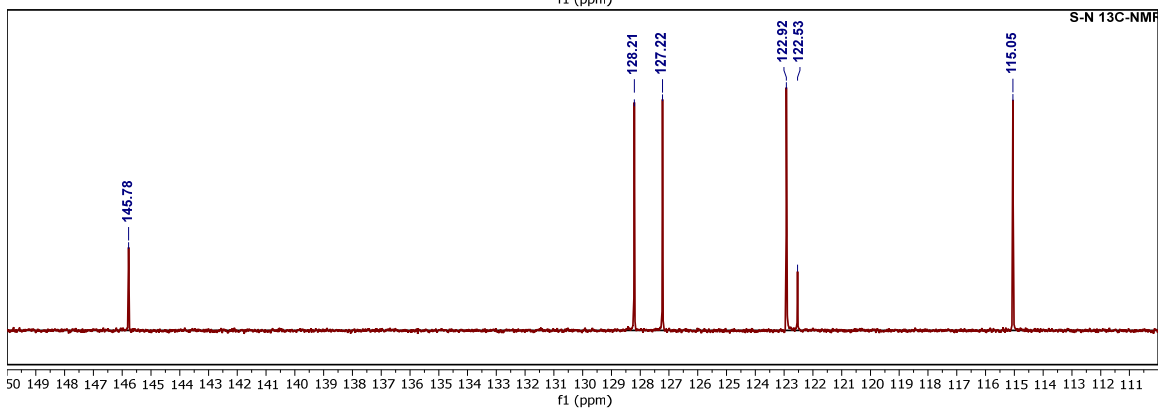

▪ Dimethyl mesitylboronate, or MesB(OMe)<sub>2</sub>

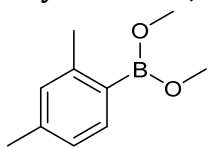

<sup>1</sup>H NMR (400 MHz, Chloroform-d)  
δ 6.81 (s, 2H), 3.56 (s, 5H), 2.32 – 2.20 (m, 9H).

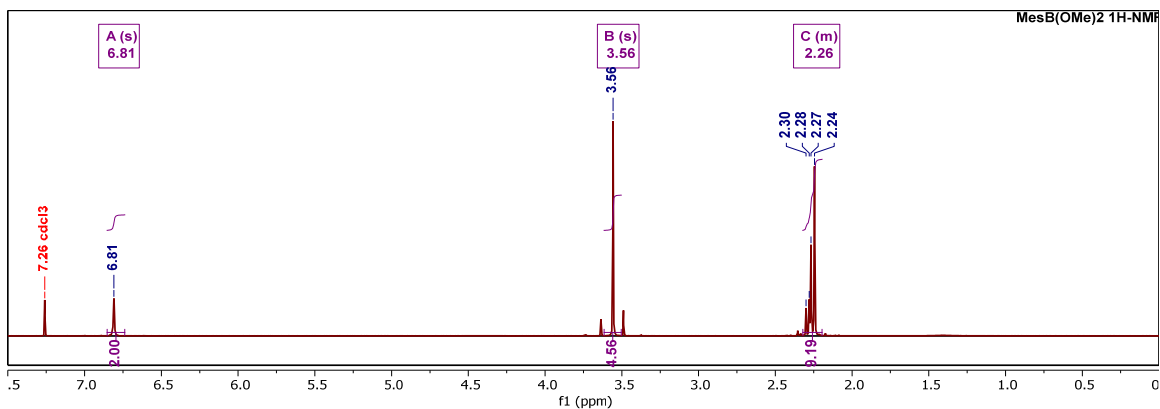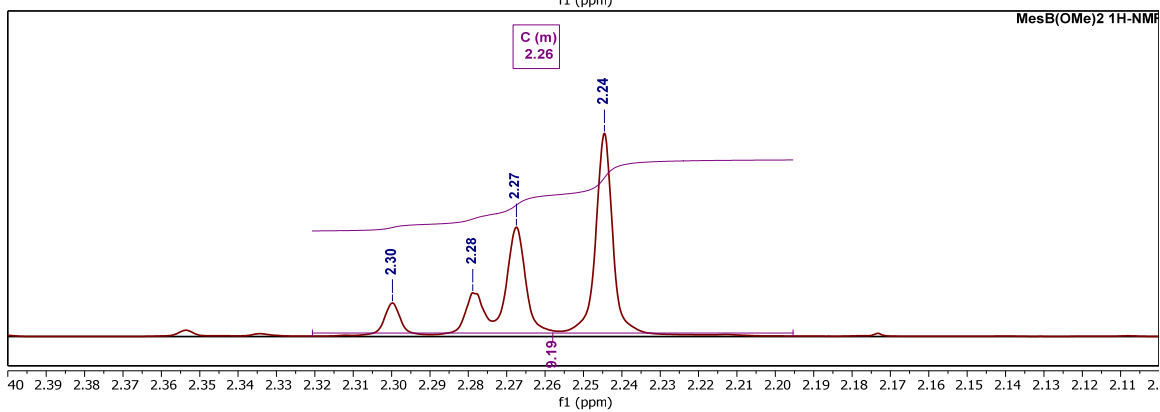

<sup>11</sup>B NMR (128 MHz, Chloroform-d)  
δ 31.30.

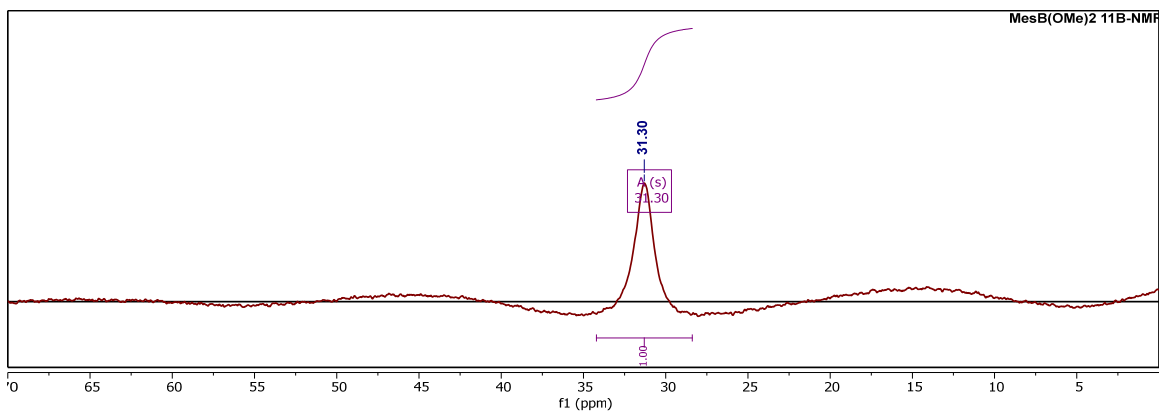

▪ Bis(2-bromophenyl)selane

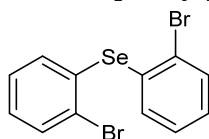

*<sup>1</sup>H NMR (500 MHz, Chloroform-*d*)*

$\delta$  7.63 (dd,  $J = 7.6, 1.6$  Hz, 2H), 7.25 (dd,  $J = 7.6, 1.9$  Hz, 2H), 7.23 – 7.13 (m, 4H).

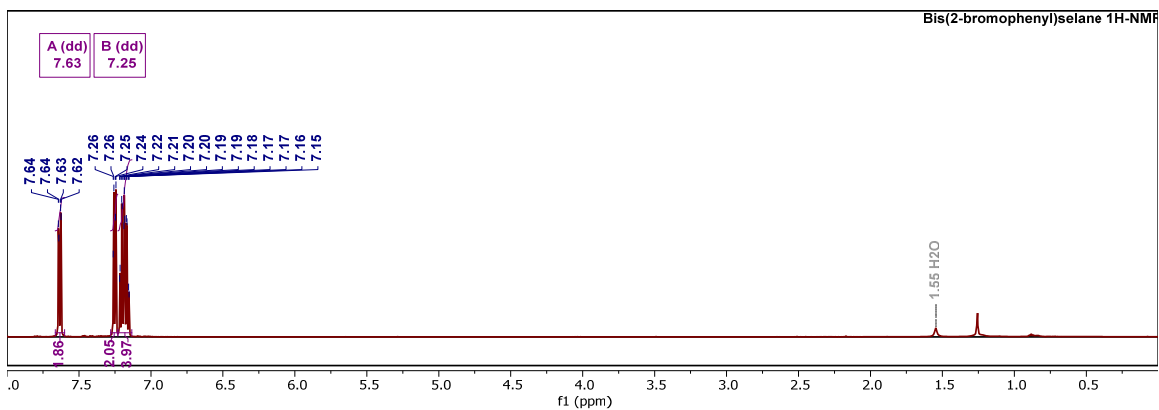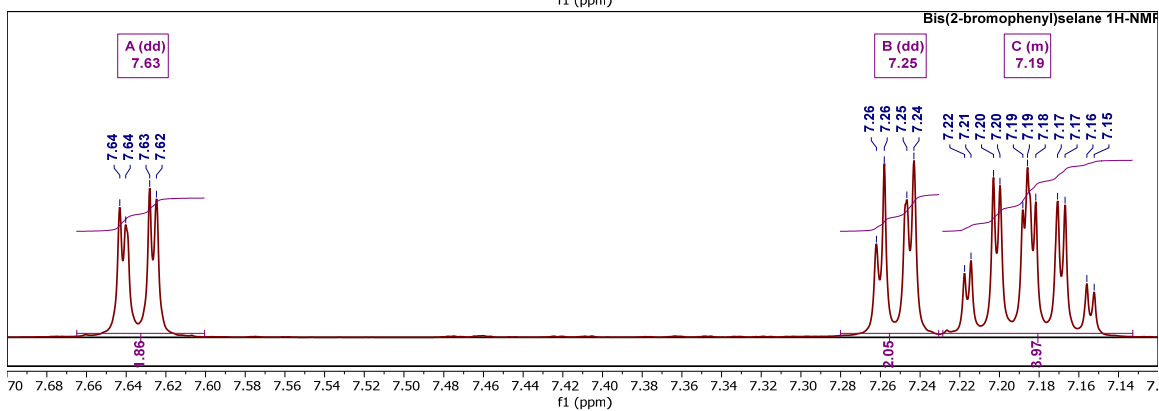



▪ Bis(2-bromophenyl)selane

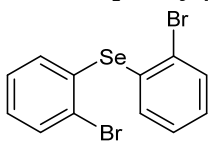

$^{13}\text{C}$  NMR (126 MHz, DMSO- $d_6$ )  
 $\delta$  134.44, 133.78, 132.71, 130.45, 129.44, 126.61.

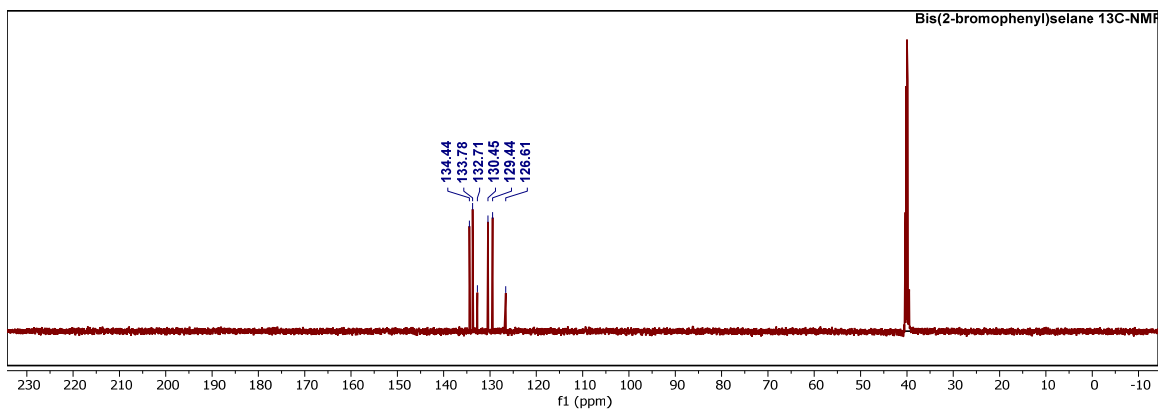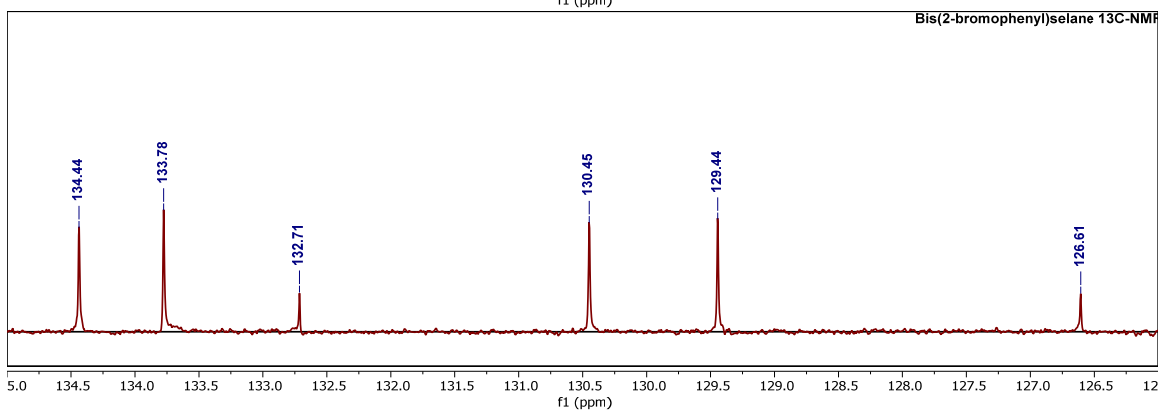

$^{77}\text{Se}$  NMR (95 MHz, Chloroform- $d$ )  
 $\delta$  462.71.

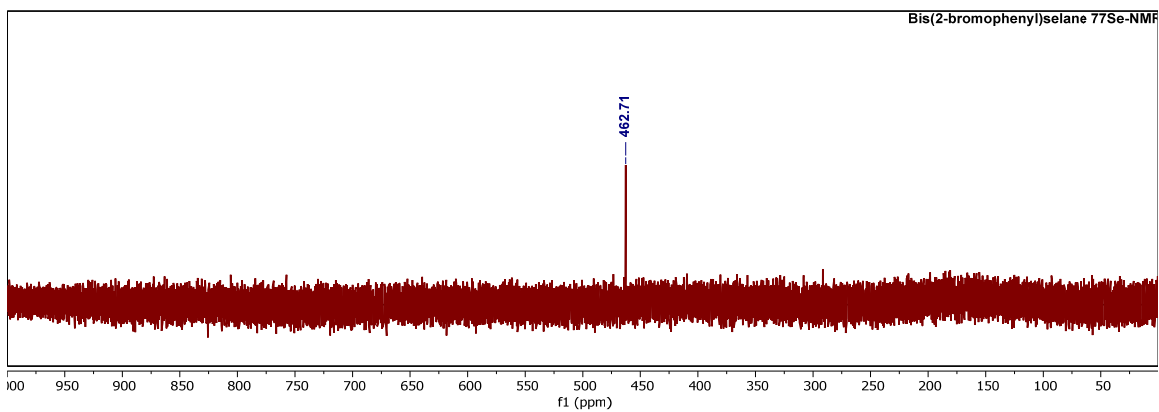

▪ (Se-B, 5) 10-mesityl-10H-dibenzo[*b,e*][1,4]selenaborinine

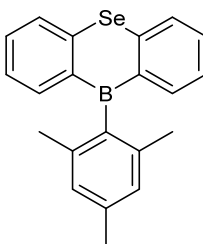

*<sup>1</sup>H NMR (500 MHz, Chloroform-*d*)*

$\delta$  7.92 – 7.87 (m, 1H), 7.84 (d, *J* = 7.9 Hz, 1H), 7.57 – 7.51 (m, 1H), 7.29 (t, *J* = 7.4 Hz, 1H), 6.94 (s, 1H), 2.41 (s, 2H), 1.93 (s, 3H).

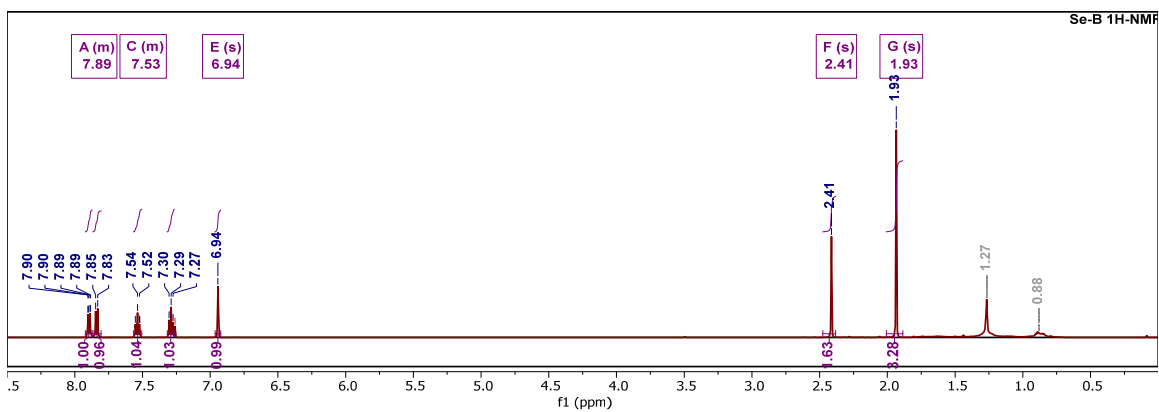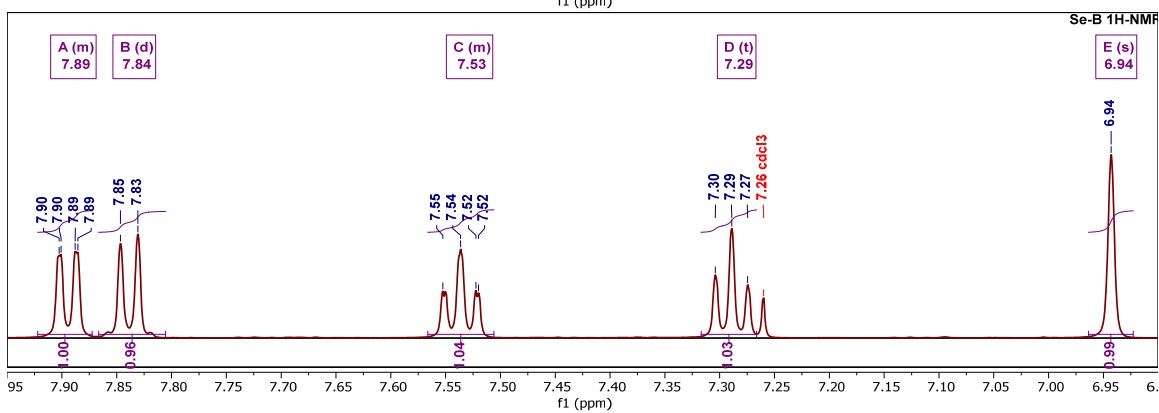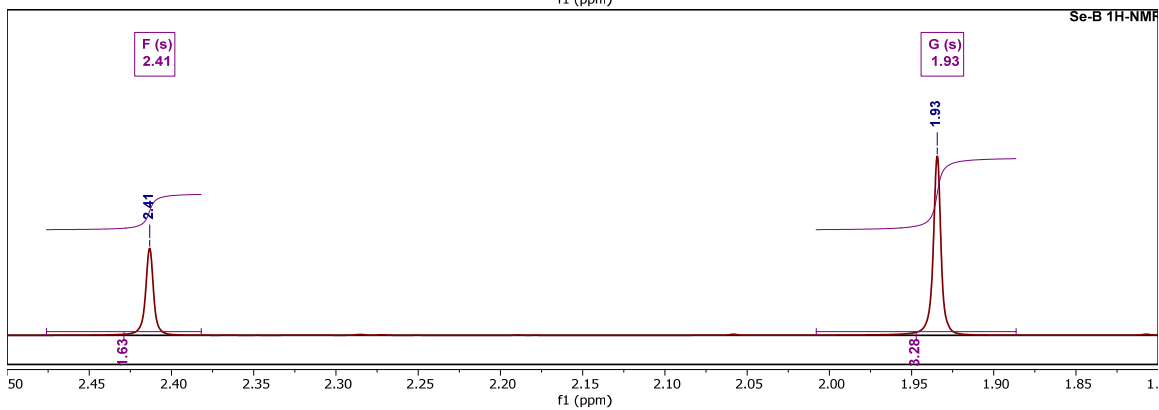

▪ (Se-B, 5) 10-mesityl-10H-dibenzo[*b,e*][1,4]selenaborinine

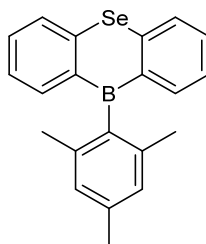

<sup>1</sup>H NMR (401 MHz, DMSO-d<sub>6</sub>)

δ 8.01 (d, *J* = 7.6 Hz, 1H), 7.72 (dd, *J* = 7.7, 1.3 Hz, 1H), 7.69 – 7.61 (m, 1H), 7.41 – 7.34 (m, 1H), 6.92 (s, 1H), 2.33 (s, 2H), 1.83 (s, 3H).

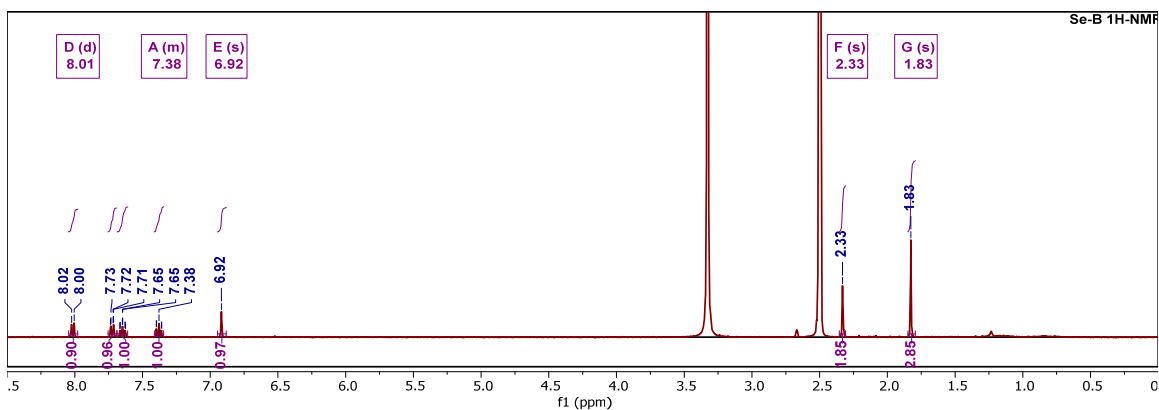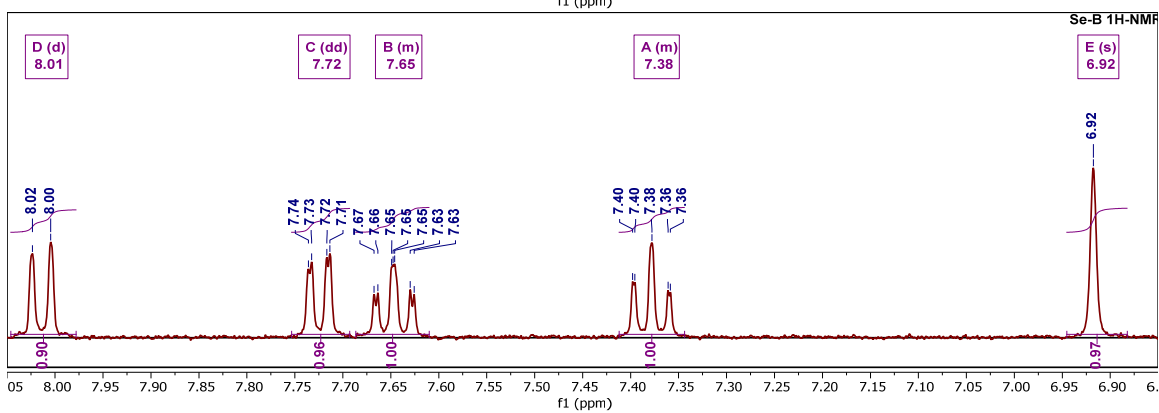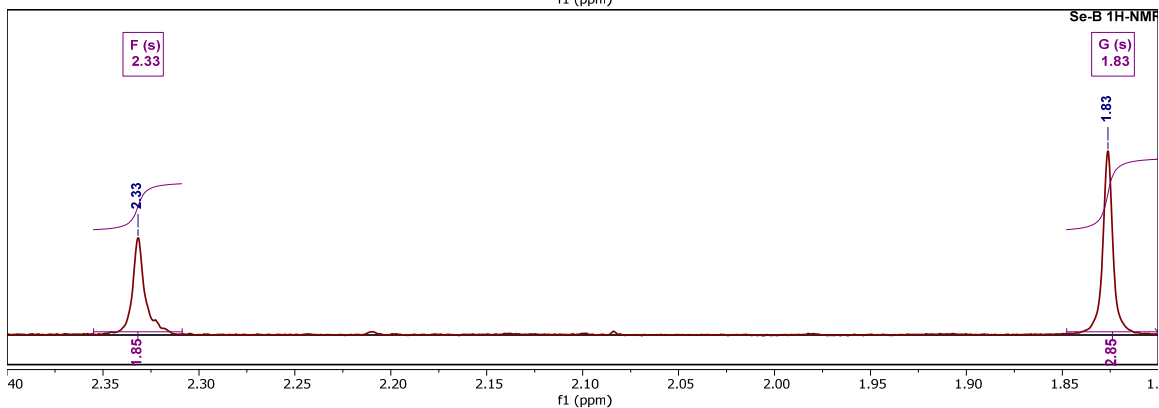

▪ (Se-B, 5) 10-mesityl-10H-dibenzo[*b,e*][1,4]selenaborinine

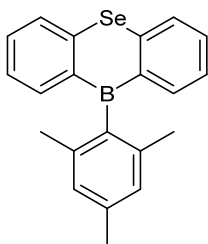

$^{13}\text{C}$  NMR (126 MHz,  $\text{DMSO-d}_6$ )

$\delta$  143.74, 140.39, 137.46, 136.11, 134.96, 132.75, 127.86, 127.07, 125.71, 118.06, 22.50, 20.85.

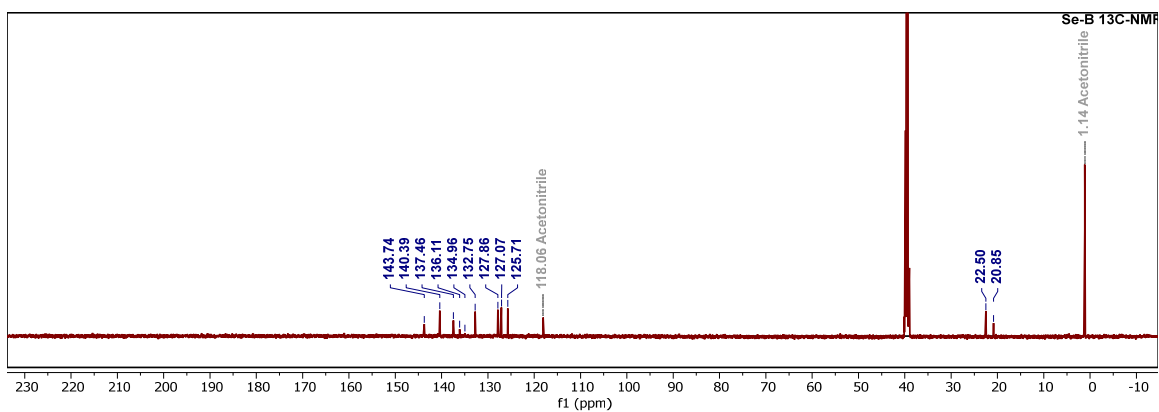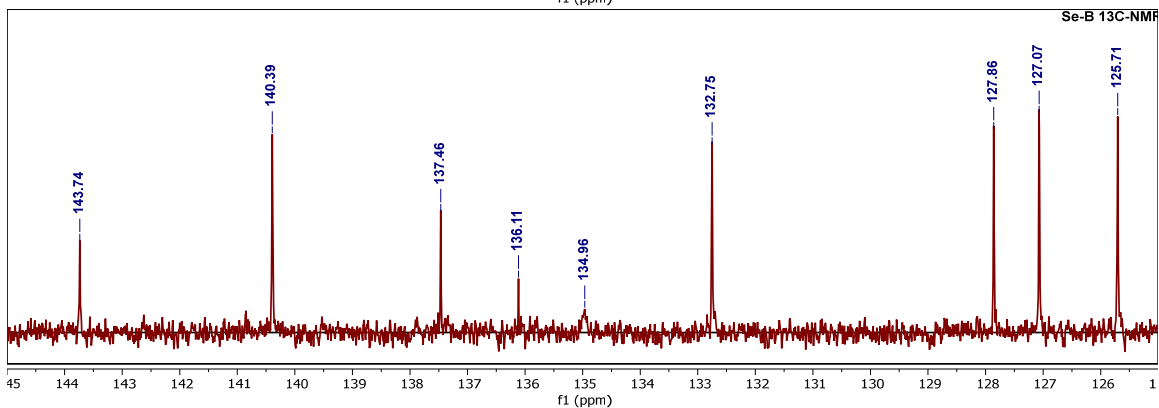

▪ (Se-B, 5) 10-mesityl-10H-dibenzo[*b,e*][1,4]selenaborinine

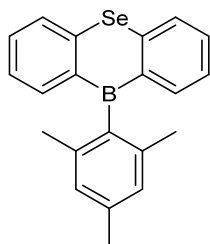

$^{11}\text{B}$  NMR (128 MHz, Chloroform-*d*)  
 $\delta$  61.79.

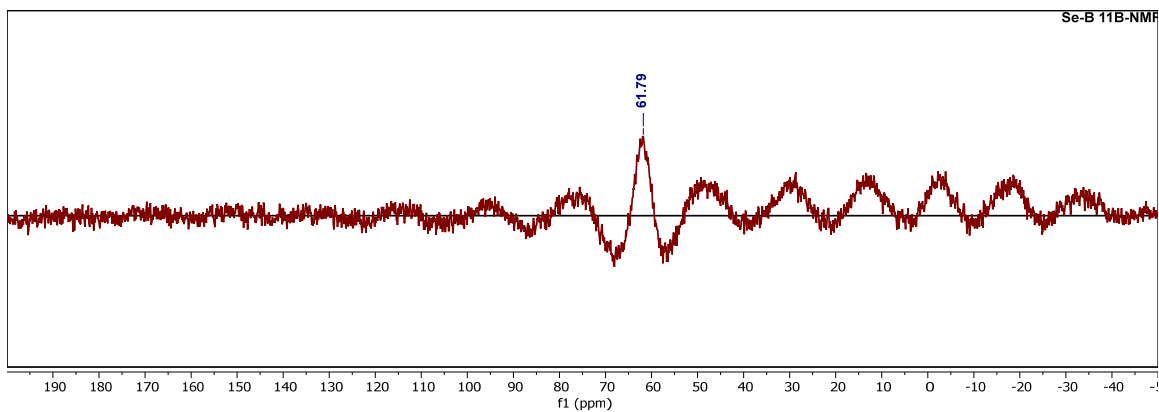

$^{77}\text{Se}$  NMR (95 MHz, Chloroform-*d*)  
 $\delta$  409.75.

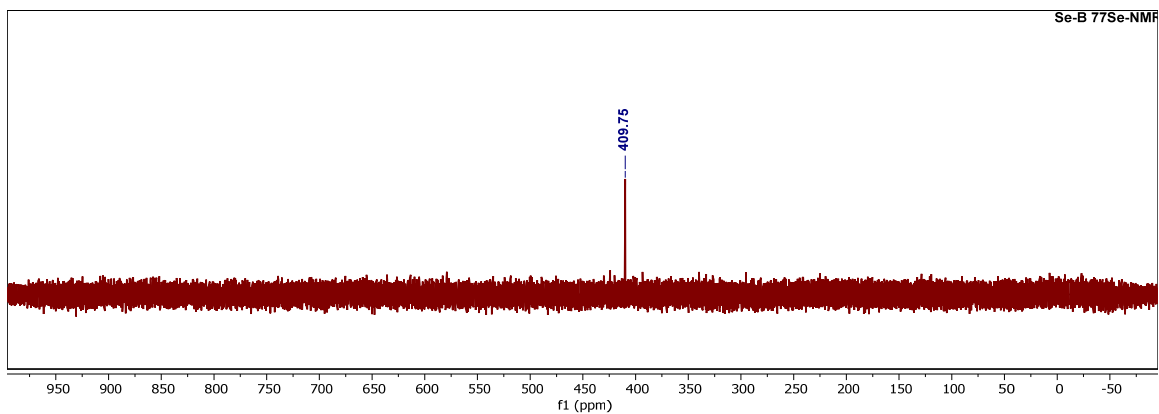

▪ Bis(2-bromophenyl)sulfane

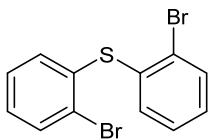

$^1\text{H NMR}$  (401 MHz, Chloroform- $d$ )

$\delta$  7.65 (dd,  $J = 7.8, 1.2$  Hz, 2H), 7.24 (dd,  $J = 7.6, 1.4$  Hz, 2H), 7.18 – 7.11 (m, 4H).

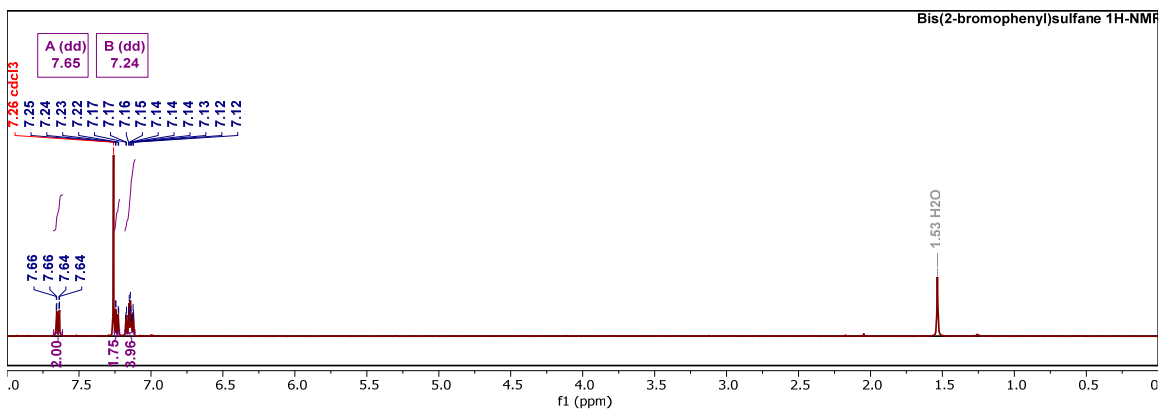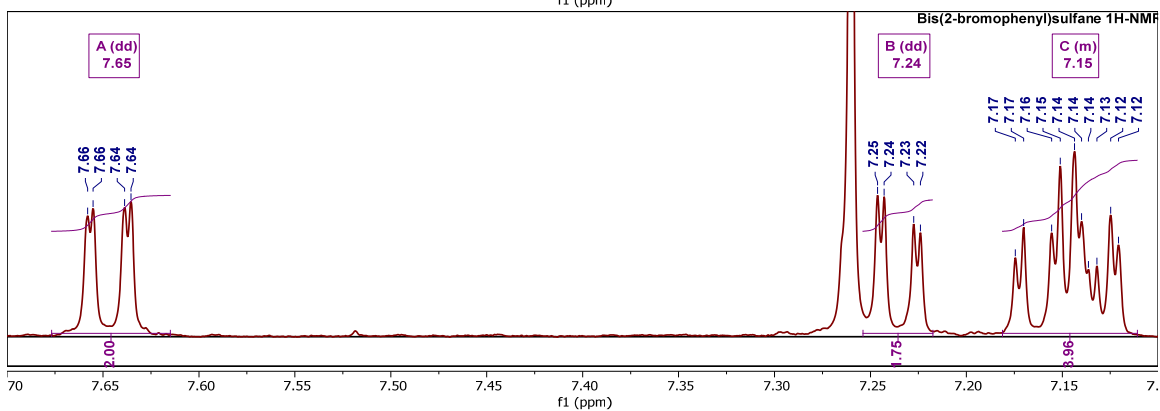

▪ Bis(2-bromophenyl)sulfane

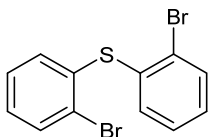

$^1\text{H NMR}$  (500 MHz, DMSO- $d_6$ )

$\delta$  7.79 – 7.75 (m, 2H), 7.42 – 7.38 (m, 2H), 7.30 (td,  $J = 7.6, 1.3$  Hz, 2H), 7.13 (dd,  $J = 7.8, 1.4$  Hz, 2H).

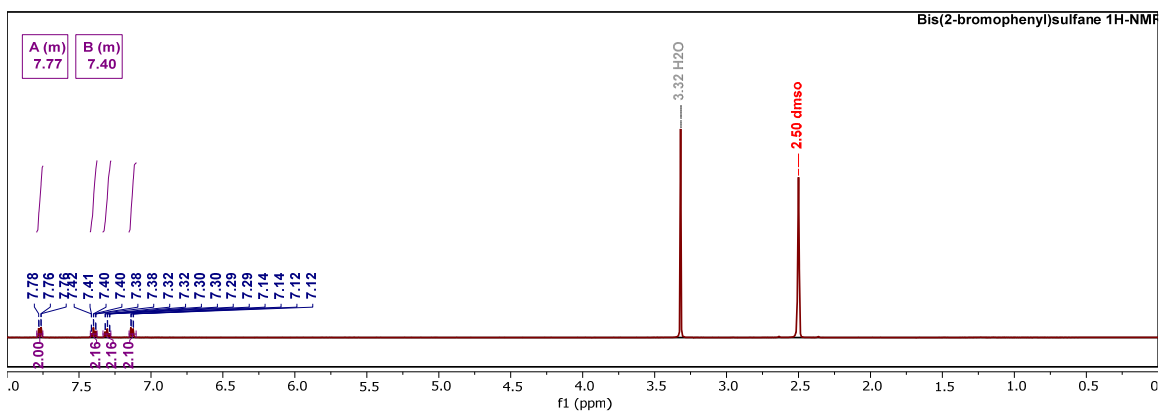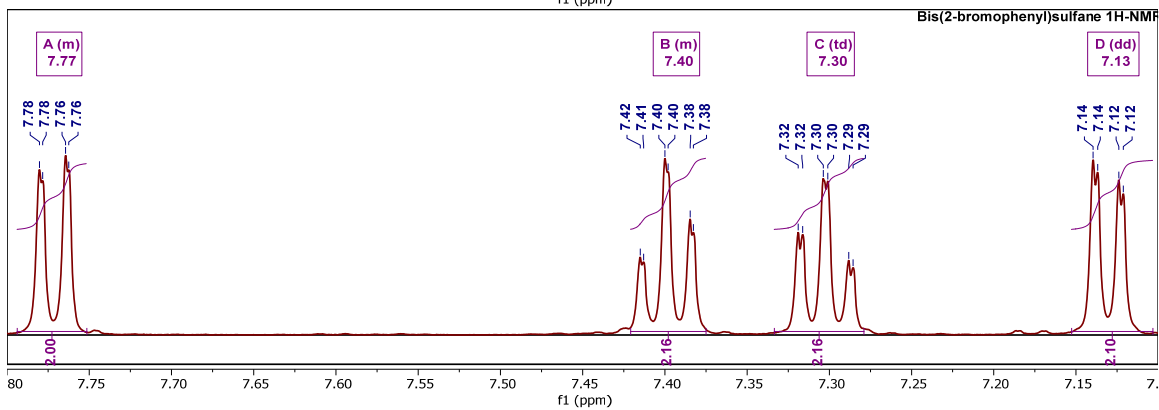

▪ Bis(2-bromophenyl)sulfane

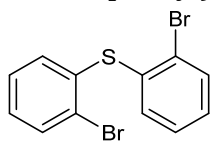

$^{13}\text{C}$  NMR (126 MHz,  $\text{DMSO-d}_6$ )  
 $\delta$  134.81, 134.02, 132.68, 130.13, 129.43, 125.35.

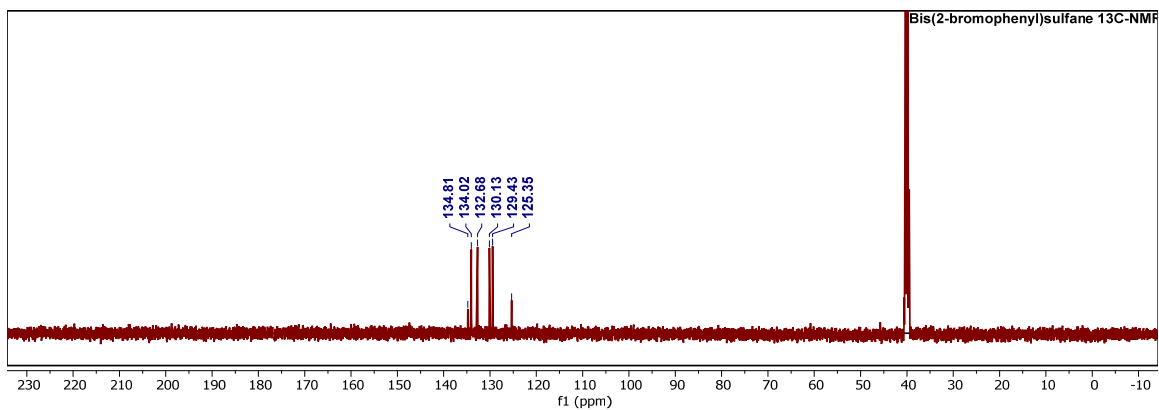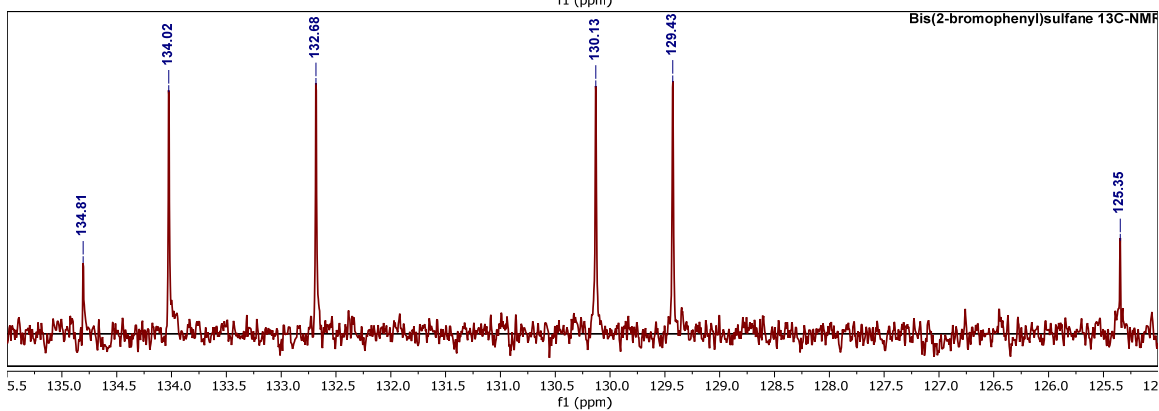



▪ (S-B, 6) 10-mesityl-10H-dibenzo[*b,e*][1,4]thiaborinine

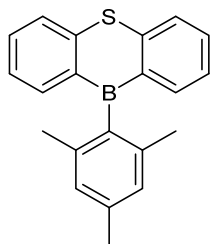

*<sup>1</sup>H NMR (400 MHz, Chloroform-*d*)*

$\delta$  7.88 (d, *J* = 7.7 Hz, 1H), 7.78 (d, *J* = 8.1 Hz, 1H), 7.62 (t, *J* = 7.5 Hz, 1H), 7.30 (t, *J* = 7.4 Hz, 1H), 6.95 (s, 1H), 2.41 (s, 2H), 1.93 (s, 3H).

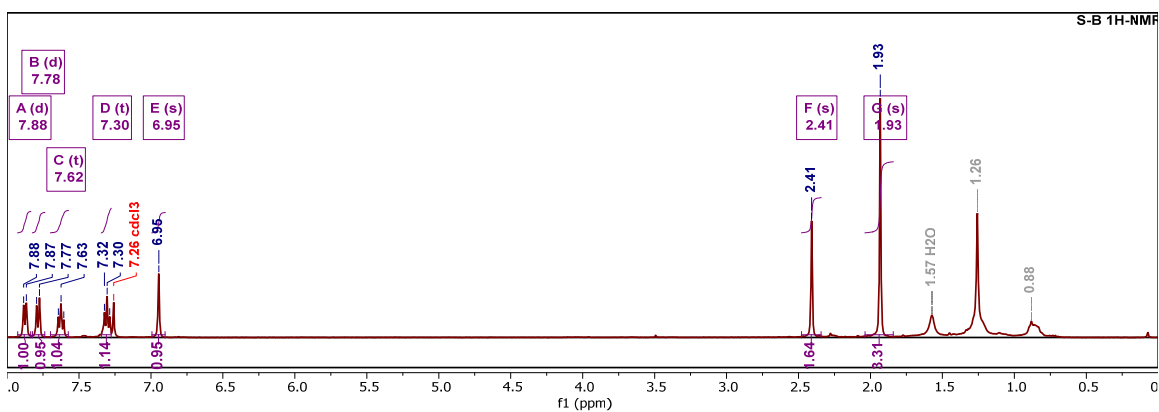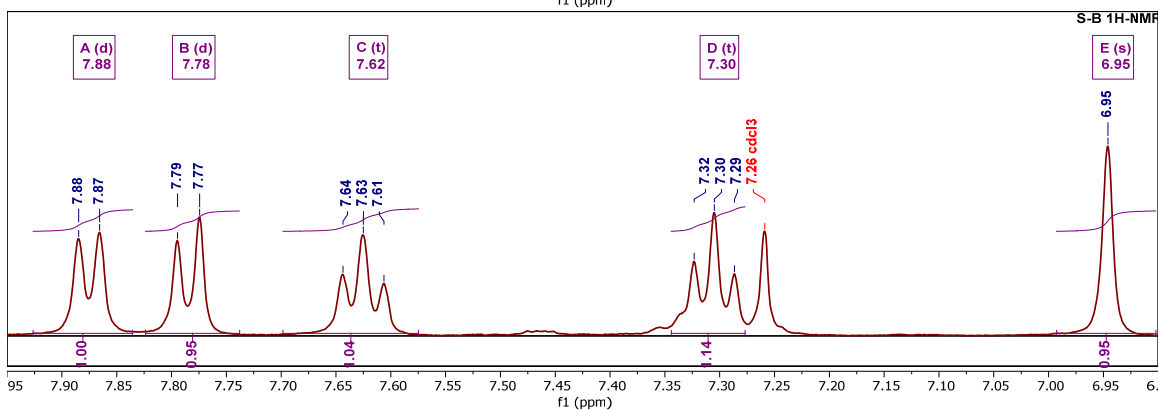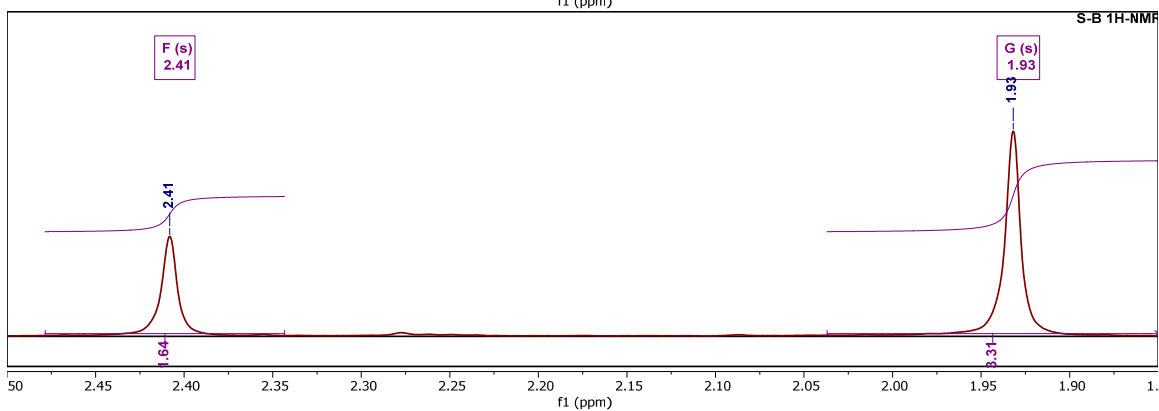

▪ (S-B, 6) 10-mesityl-10H-dibenzo[*b,e*][1,4]thiaborinine



$^1\text{H NMR}$  (500 MHz, DMSO- $d_6$ )

$\delta$  7.94 (d,  $J = 8.1$  Hz, 2H), 7.79 – 7.70 (m, 5H), 7.42 (t,  $J = 7.4$  Hz, 2H), 6.94 (s, 2H), 2.34 (s, 3H), 1.83 (s, 6H).

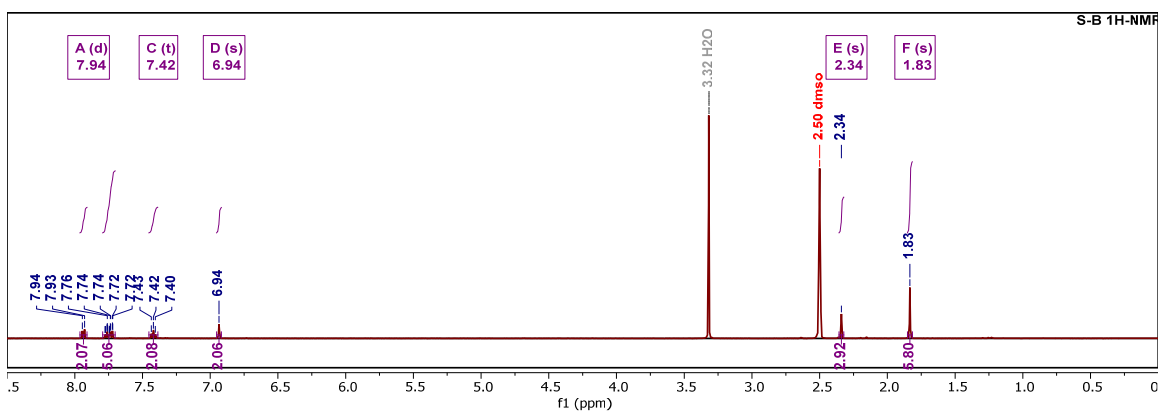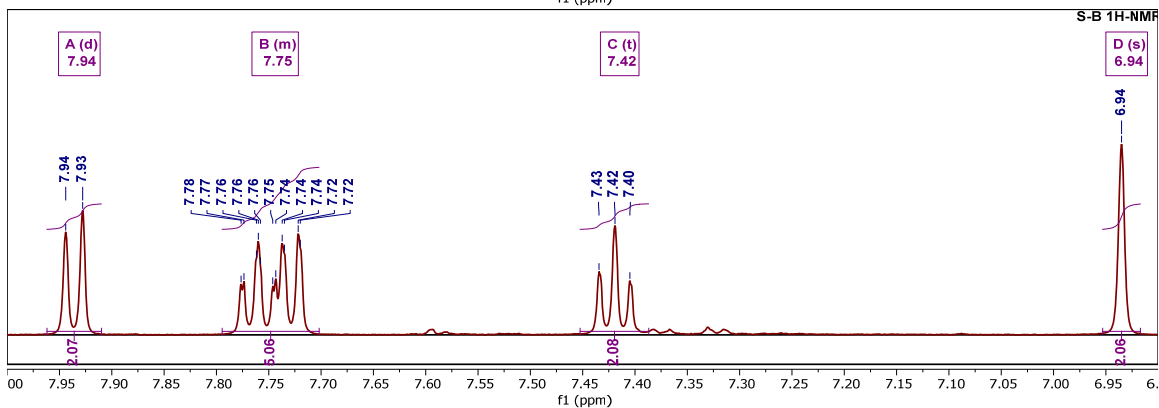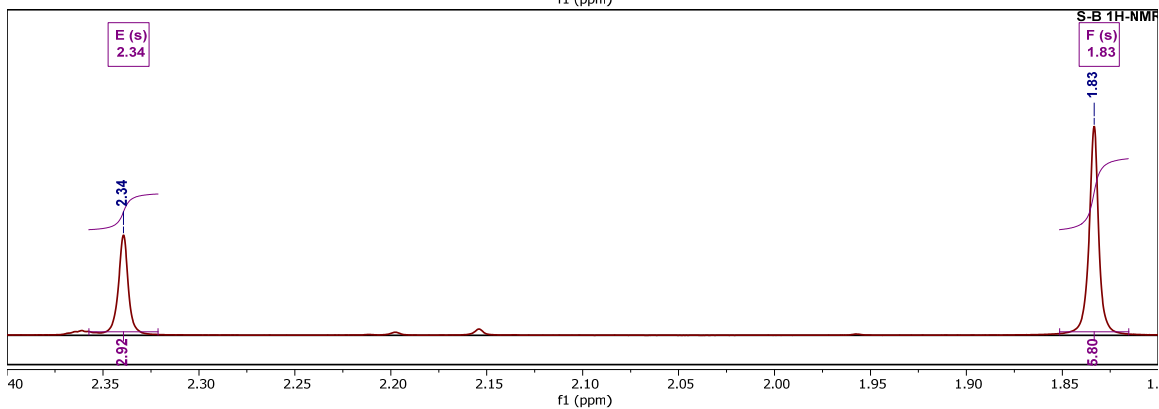

▪ (S-B, 6) 10-mesityl-10H-dibenzo[*b,e*][1,4]thiaborinine



$^{13}\text{C}$  NMR (126 MHz, DMSO-*d*<sub>6</sub>)

$\delta$  143.90, 139.28, 138.10, 136.71, 133.42, 127.50, 126.04, 125.68, 23.00, 21.33.

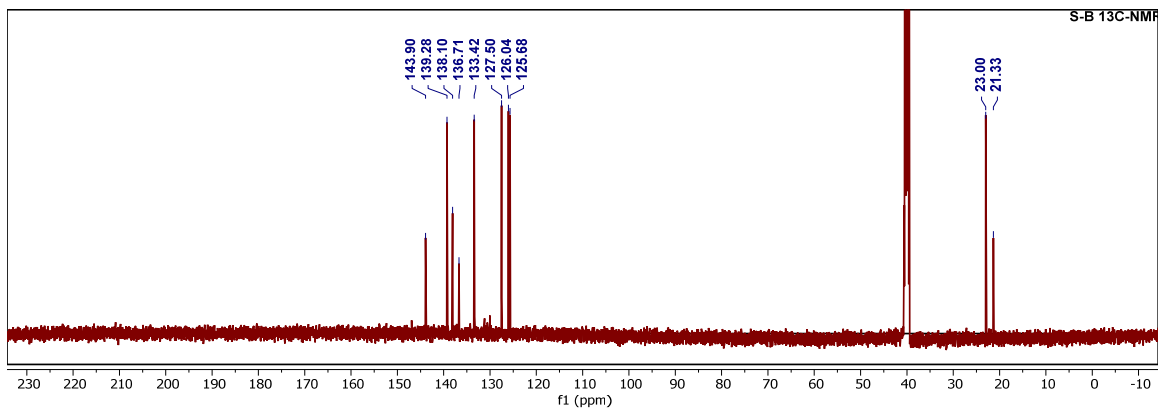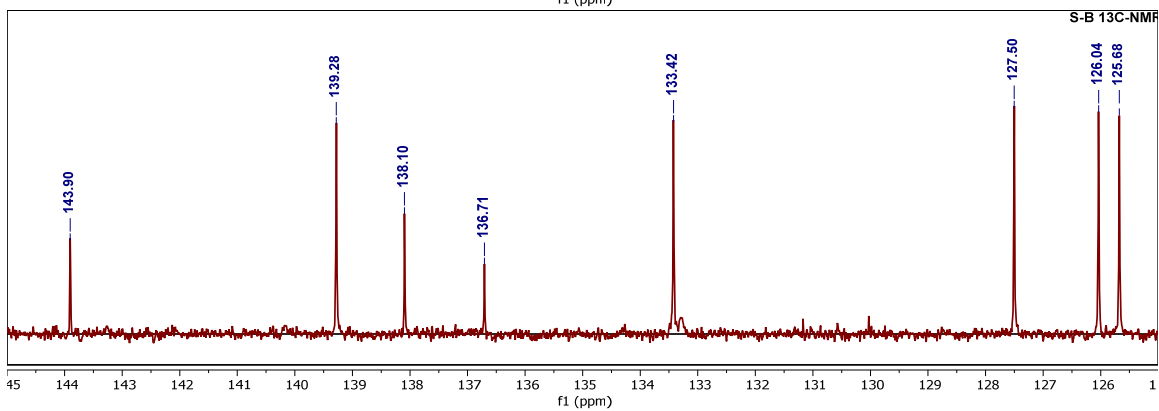

▪ **1,2-bis(2-phenoxyphenyl)diselane**

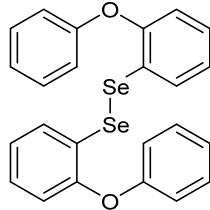

$^1\text{H}$  NMR (700 MHz, Chloroform-*d*)

$\delta$  7.69 (d,  $J = 7.9$  Hz, 2H), 7.34 (t,  $J = 7.5$  Hz, 4H), 7.18 (t,  $J = 7.7$  Hz, 2H), 7.12 (t,  $J = 7.4$  Hz, 2H), 7.02 (dd,  $J = 21.5, 8.0$  Hz, 6H), 6.83 (d,  $J = 8.1$  Hz, 2H).

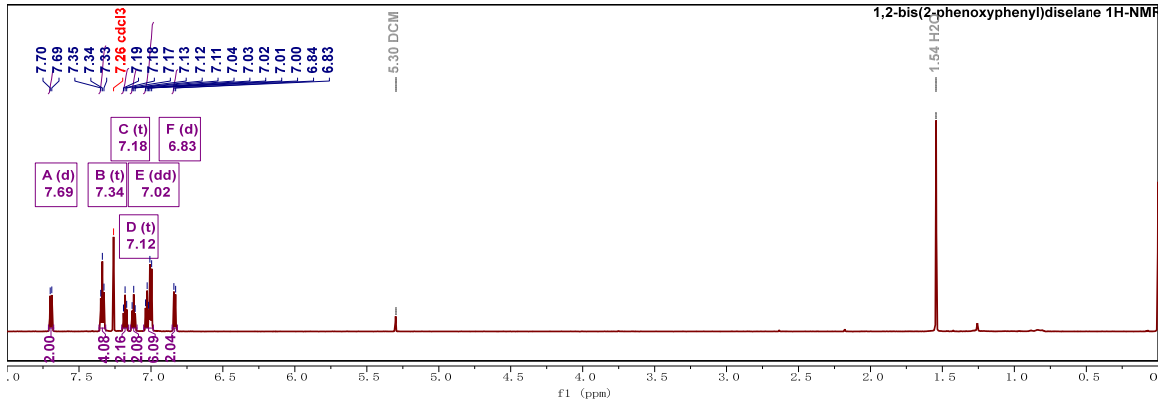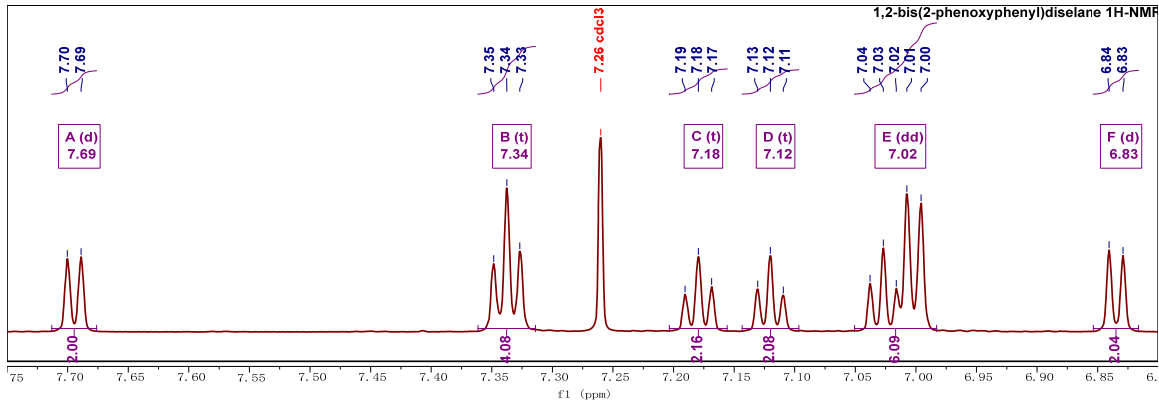

$^{77}\text{Se}$  NMR (134 MHz, Chloroform-*d*)

$\delta$  354.66.

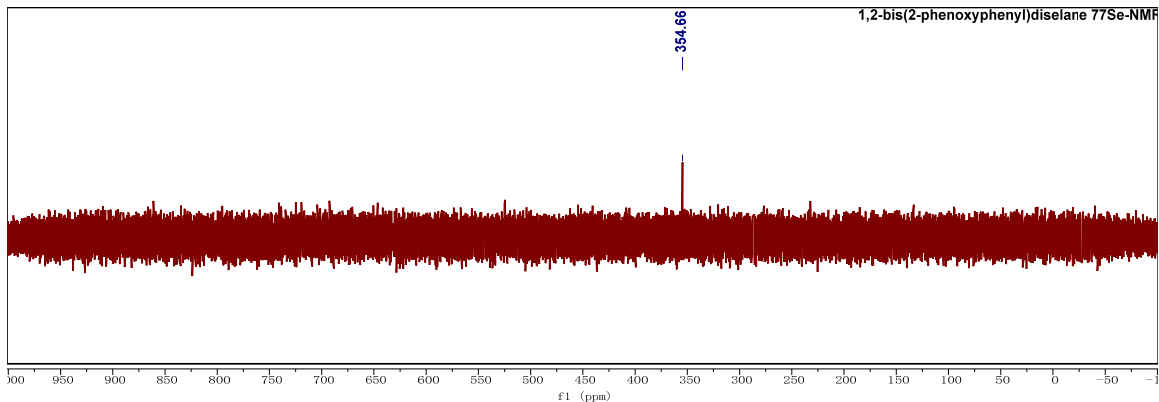

▪ (Se-O, 3) Phenoxaselenine

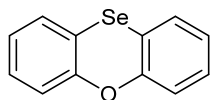

$^1\text{H NMR}$  (500 MHz, Chloroform- $d$ )

$\delta$  7.30 (d,  $J = 7.6$  Hz, 2H), 7.20 (t,  $J = 7.7$  Hz, 2H), 7.12 (d,  $J = 8.0$  Hz, 2H), 7.04 (t,  $J = 7.4$  Hz, 2H).

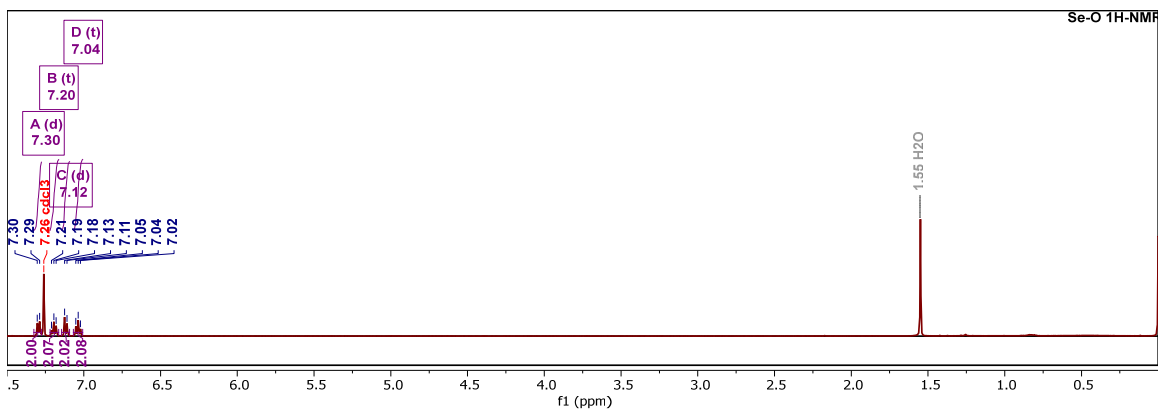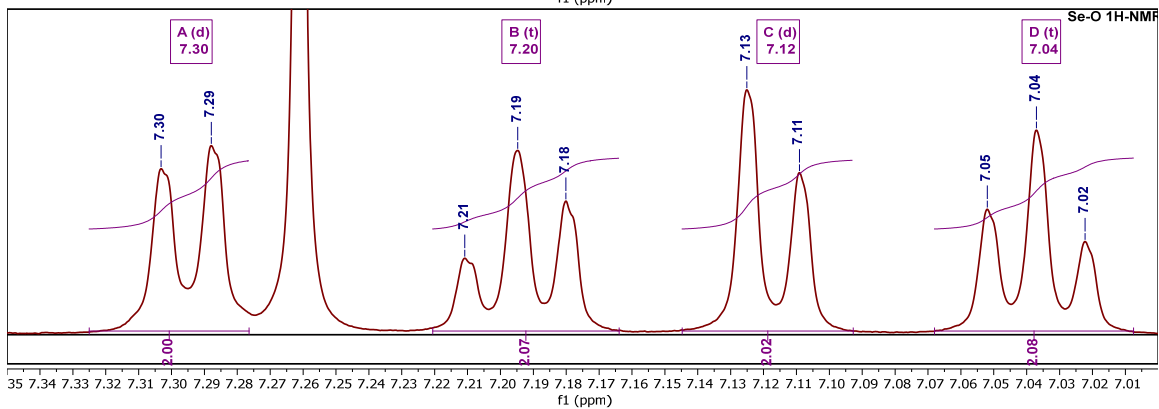

▪ (Se-O, 3) Phenoxaselenine

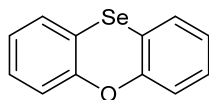

$^1\text{H NMR}$  (500 MHz, DMSO- $d_6$ )

$\delta$  7.47 (dd,  $J = 7.7, 1.4$  Hz, 1H), 7.30 – 7.24 (m, 1H), 7.18 (dd,  $J = 8.1, 1.1$  Hz, 1H), 7.12 (td,  $J = 7.5, 1.2$  Hz, 1H).

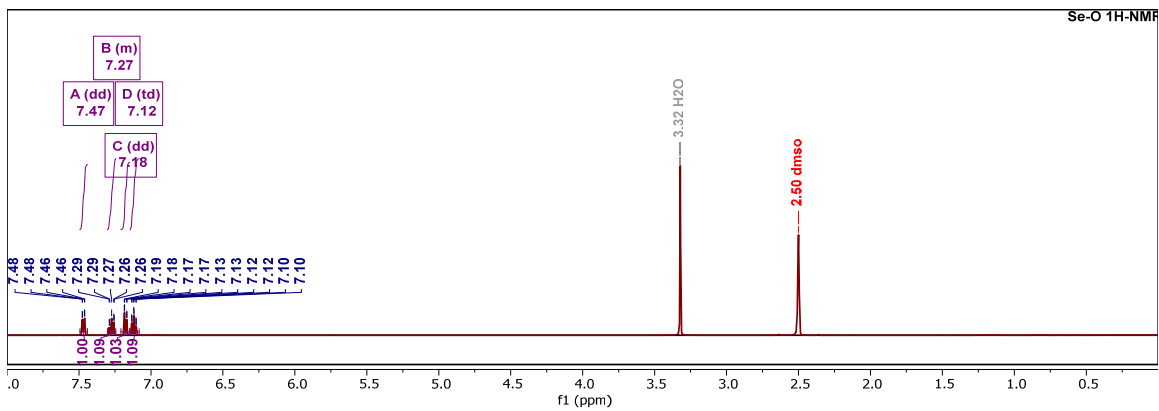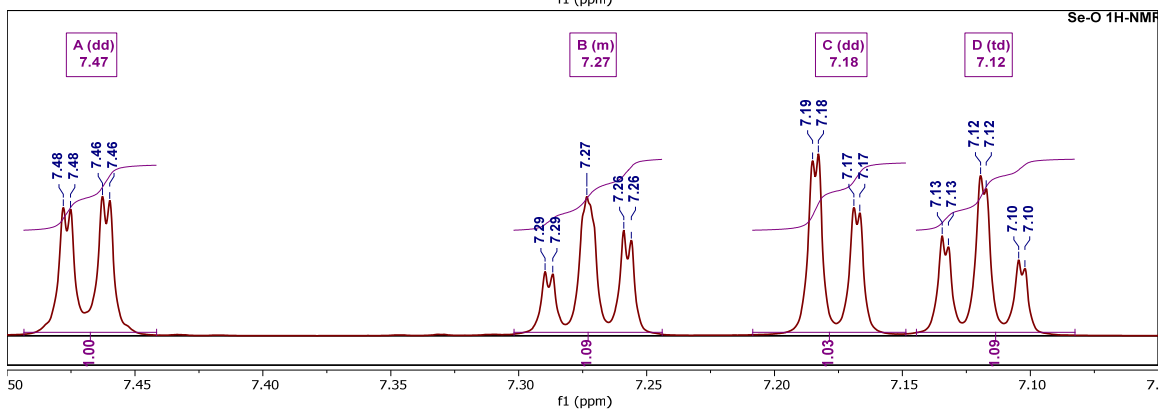

▪ (Se-O, 3) Phenoxaselenine



$^{13}\text{C}$  NMR (126 MHz, DMSO- $d_6$ )  
 $\delta$  152.68, 130.24, 129.11, 125.87, 118.96, 116.33.

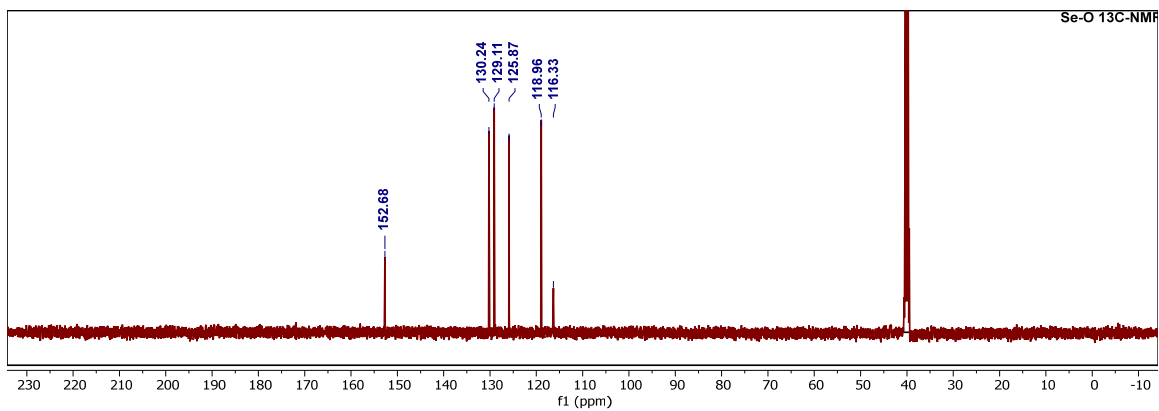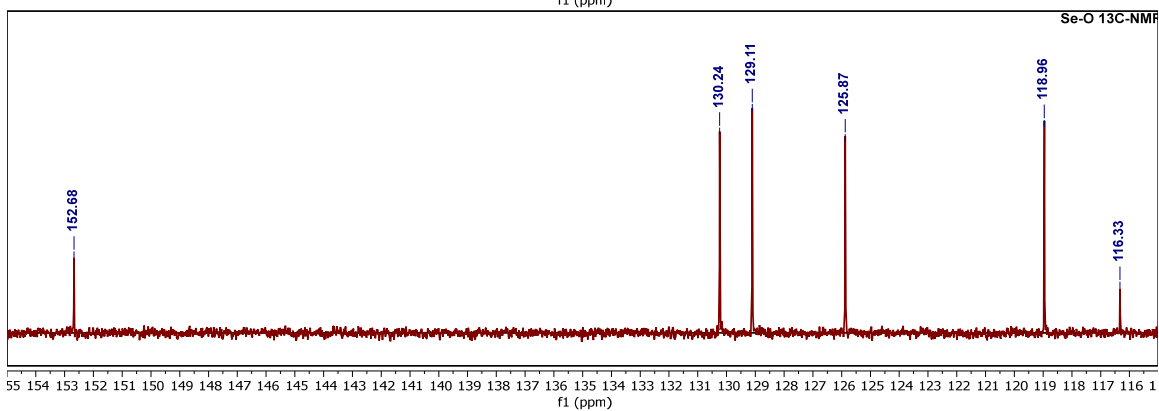

$^{77}\text{Se}$  NMR (134 MHz, Chloroform- $d$ )  
 $\delta$  256.69.

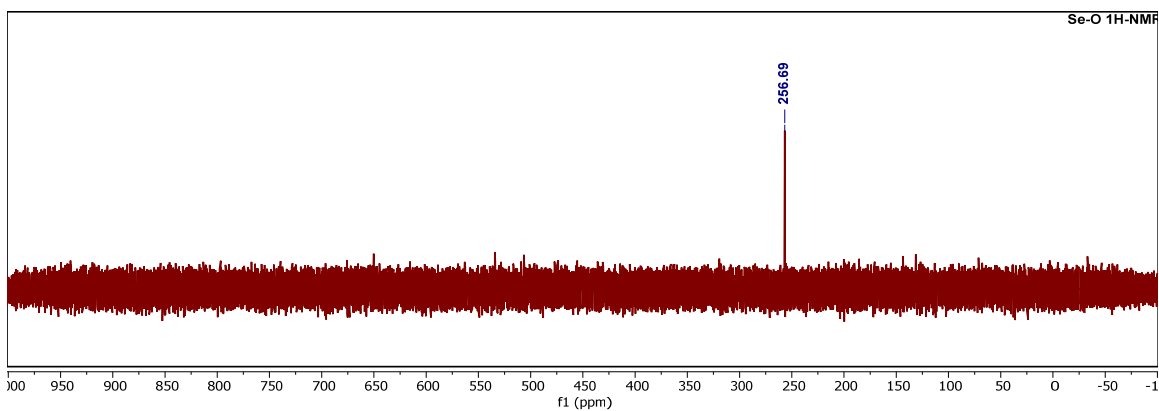

## VII. Reference

1. Kolek, M., Otteny, F., Schmidt, P., Mück-Lichtenfeld, C., Einholz, C., Becking, J., Schleicher, E., Winter, M., Bieker, P. & Esser, B. Ultra-high cycling stability of poly(vinylphenothiazine) as a battery cathode material resulting from  $\pi$ - $\pi$  Interactions. *Energy and Environmental Science* **10**, 2334–2341 (2017).
2. Kobayashi, J., Kato, K., Agou, T. & Kawashima, T. Synthesis of Dibenzochalcogenaborins and Systematic Comparisons of Their Optical Properties by Changing a Bridging Chalcogen Atom. *Chemistry - An Asian Journal* **4**, 42–49 (2009).
3. Toma, A. M., Nicoarø, A., Silvestru, A., Ruffer, T., Lang, H. & Mehring, M. Bis(2-Phenoxyphenyl)dichalcogenides and Their Chemical Reactivity. *Journal of Organometallic Chemistry* **810**, 33–39 (2016).
4. Ansari, R., Shao, W., Yoon, S. J., Kim, J. & Kieffer, J. Charge Transfer as the Key Parameter Affecting the Color Purity of Thermally Activated Delayed Fluorescence Emitters. *ACS Applied Materials and Interfaces* **13**, 28529–28537 (2021).
5. Knöller, J. A., Meng, G., Wang, X., Hall, D., Pershin, A., Beljonne, D., Olivier, Y., Laschat, S., Zysman-Colman, E. & Wang, S. Intramolecular Borylation via Sequential B–Mes Bond Cleavage for the Divergent Synthesis of B,N,B-Doped Benzo[4]helicenes. *Angewandte Chemie International Edition* **59**, 3156–3160 (2020).
6. Li, C., Møllerup, S. K., Wang, X. & Wang, S. Accessing Two-Stage Regioselective Photoisomerization in Unsymmetrical N,C-Chelate Organoboron Compounds: Reactivity of B(ppz)(Mes)Ar. *Organometallics* **37**, 3360–3367 (2018).
7. Yaqoob Bhat, M., Kumar, A. & Naveed Ahmed, Q. Selenium dioxide promoted dinitrogen extrusion/direct selenation of arylhydrazines and anilines. *Tetrahedron* **76**, 131105 (2020).
8. Li, Y., Nie, C., Wang, H., Li, X., Verpoort, F. & Duan, C. A Highly Efficient Method for the Copper-Catalyzed Selective Synthesis of Diaryl Chalcogenides from Easily Available Chalcogen Sources. *European Journal of Organic Chemistry* **2011**, 7331–7338 (2011).
9. Shao, Y., Gan, Z., Epifanovsky, E., Gilbert, A. T. B., Wormit, M., Kussmann, J., Lange, A. W., Behn, A., Deng, J., Feng, X., Ghosh, D., Goldey, M., Horn, P. R., Jacobson, L. D., Kaliman, I., Khaliullin, R. Z., Kuš, T., Landau, A., Liu, J., Proynov, E. I., Rhee, Y. M., Richard, R. M., Rohrdanz, M. A., Steele, R. P., Sundstrom, E. J., Woodcock, H. L., Zimmerman, P. M., Zuev, D., Albrecht, B., Alguire, E., Austin, B., Beran, G. J. O., Bernard, Y. A., Berquist, E., Brandhorst, K., Bravaya, K. B., Brown, S. T., Casanova, D., Chang, C. M., Chen, Y., Chien, S. H., Closser, K. D., Crittenden, D. L., Diedenhofen, M., Distasio, R. A., Do, H., Dutoi, A. D., Edgar, R. G., Fatehi, S., Fusti-Molnar, L., Ghysels, A., Golubeva-Zadorozhnaya, A., Gomes, J., Hanson-Heine, M. W. D., Harbach, P. H. P., Hauser, A. W., Hohenstein, E. G., Holden, Z. C., Jagau, T. C., Ji, H., Kaduk, B., Khistyayev, K., Kim, J., Kim, J., King, R. A., Klunzinger, P., Kosenkov, D., Kowalczyk, T., Krauter, C. M., Lao, K. U., Laurent, A. D., Lawler, K. v., Levchenko, S. v., Lin, C. Y., Liu, F., Livshits, E., Lochan, R. C., Luenser, A., Manohar, P., Manzer, S. F., Mao, S. P., Mardirossian, N., Marenich, A. v., Maurer, S. A., Mayhall, N. J., Neuscamman, E., Oana, C. M., Olivares-Amaya, R., Oneill, D. P., Parkhill, J. A., Perrine, T. M., Peverati, R., Prociuk, A., Rehn, D. R., Rosta, E., Russ, N. J., Sharada, S. M., Sharma, S., Small, D. W., Sodt, A., Stein, T., Stück, D., Su, Y. C., Thom, A. J. W., Tsuchimochi, T., Vanovschi, V., Vogt, L., Vydrov, O., Wang, T., Watson, M. A., Wenzel, J., White, A., Williams, C. F., Yang, J., Yeganeh, S., Yost, S. R., You, Z. Q., Zhang, I. Y., Zhang, X., Zhao, Y., Brooks, B. R., Chan, G. K. L., Chipman, D. M., Cramer, C. J., Goddard, W. A., Gordon, M. S., Hehre, W. J., Klamt, A., Schaefer, H. F., Schmidt, M. W., Sherrill, C. D., Truhlar, D. G., Warshel, A., Xu, X., Aspuru-Guzik, A., Baer, R., Bell, A. T.,



- Besley, N. A., Chai, J. da, Dreuw, A., Dunietz, B. D., Furlani, T. R., Gwaltney, S. R., Hsu, C. P., Jung, Y., Kong, J., Lambrecht, D. S., Liang, W., Ochsenfeld, C., Rassolov, V. A., Slipchenko, L. v., Subotnik, J. E., van Voorhis, T., Herbert, J. M., Krylov, A. I., Gill, P. M. W. & Head-Gordon, M. Advances in Molecular Quantum Chemistry Contained in the Q-Chem 4 Program Package. *Molecular Physics* **113**, 184–215 (2015).
10. Weigend, F. Accurate Coulomb-fitting basis sets for H to Rn. *Physical Chemistry Chemical Physics* **8**, 1057–1065 (2006).
  11. Weigend, F. & Ahlrichs, R. Balanced basis sets of split valence, triple zeta valence and quadruple zeta valence quality for H to Rn: Design and assessment of accuracy. *Physical Chemistry Chemical Physics* **7**, 3297–3305 (2005).
  12. Chai, J. da & Head-Gordon, M. Systematic optimization of long-range corrected hybrid density functionals. *Journal of Chemical Physics* **128**, 84106 (2008).
  13. Chai, J. da & Head-Gordon, M. Long-range corrected hybrid density functionals with damped atom-atom dispersion corrections. *Physical Chemistry Chemical Physics* **10**, 6615–6620 (2008).
  14. Pokhilko, P., Epifanovsky, E. & Krylov, A. I. General framework for calculating spin-orbit couplings using spinless one-particle density matrices: Theory and application to the equation-of-motion coupled-cluster wave functions. *Journal of Chemical Physics* **151**, (2019).
  15. Plasser, F., Wormit, M. & Dreuw, A. New tools for the systematic analysis and visualization of electronic excitations. I. Formalism. *Journal of Chemical Physics* **141**, 024106 (2014).
  16. Allouche, A.-R. Gabedit-A graphical user interface for computational chemistry softwares. *Journal of Computational Chemistry* **32**, 174–182 (2011).
